# Supplementary material for: Seroprevalence of Entamoeba histolytica at a voluntary counselling and testing centre in Tokyo: a cross-sectional study
Source: PubMed Central journal article supplement — BMJ Open. 2020 Feb 25;10(2):e031605. doi: 10.1136/bmjopen-2019-031605 (PMC7044870; doi:10.1136/bmjopen-2019-031605), 2020-02-25
Supplement: bmjopen-2019-031605.draft_revisions.pdf [file bmjopen-2019-031605.draft_revisions.pdf]

# BMJ Open

BMJ Open is committed to open peer review. As part of this commitment we make the peer review history of every article we publish publicly available.

When an article is published we post the peer reviewers' comments and the authors' responses online. We also post the versions of the paper that were used during peer review. These are the versions that the peer review comments apply to.

The versions of the paper that follow are the versions that were submitted during the peer review process. They are not the versions of record or the final published versions. They should not be cited or distributed as the published version of this manuscript.

BMJ Open is an open access journal and the full, final, typeset and author-corrected version of record of the manuscript is available on our site with no access controls, subscription charges or pay-per-view fees (<http://bmjopen.bmj.com>).

If you have any questions on BMJ Open's open peer review process please email [info.bmjopen@bmj.com](mailto:info.bmjopen@bmj.com)

# BMJ Open

## Higher seroprevalence of *Entamoeba histolytica* than that of HIV-1 at a voluntary counselling and testing centre in Tokyo

|                               |                                                                                                                                                                                                                                                                                                                                                                                                                                                                                                                                                                                                                                                                                                                                                                                                                                                                                                                                                                                                                                                                                                                                                                            |
|-------------------------------|----------------------------------------------------------------------------------------------------------------------------------------------------------------------------------------------------------------------------------------------------------------------------------------------------------------------------------------------------------------------------------------------------------------------------------------------------------------------------------------------------------------------------------------------------------------------------------------------------------------------------------------------------------------------------------------------------------------------------------------------------------------------------------------------------------------------------------------------------------------------------------------------------------------------------------------------------------------------------------------------------------------------------------------------------------------------------------------------------------------------------------------------------------------------------|
| Journal:                      | <i>BMJ Open</i>                                                                                                                                                                                                                                                                                                                                                                                                                                                                                                                                                                                                                                                                                                                                                                                                                                                                                                                                                                                                                                                                                                                                                            |
| Manuscript ID                 | bmjopen-2019-031605                                                                                                                                                                                                                                                                                                                                                                                                                                                                                                                                                                                                                                                                                                                                                                                                                                                                                                                                                                                                                                                                                                                                                        |
| Article Type:                 | Research                                                                                                                                                                                                                                                                                                                                                                                                                                                                                                                                                                                                                                                                                                                                                                                                                                                                                                                                                                                                                                                                                                                                                                   |
| Date Submitted by the Author: | 11-May-2019                                                                                                                                                                                                                                                                                                                                                                                                                                                                                                                                                                                                                                                                                                                                                                                                                                                                                                                                                                                                                                                                                                                                                                |
| Complete List of Authors:     | <p>YANAGAWA, Yasuaki; National Center for Global Health and Medicine Hospital, AIDS Clinical Center; National Institute of Infectious Diseases, Department of Parasitology<br/> Nagashima, Mami; Tokyo Metropolitan Institute for Public Health, Department of Microbiology<br/> Gatanaga, Hiroyuki; National Center for Global Health and Medicine Hospital, AIDS Clinical Center; Kumamoto University, Center for AIDS Research<br/> Kikuchi, Yoshimi; National Center for Global Health and Medicine Hospital, AIDS Clinical Center<br/> Oka, Shinichi; National Center for Global Health and Medicine Hospital, AIDS Clinical Center; Kumamoto University, Center for AIDS Research<br/> Yokoyama, Keiko; Tokyo Metropolitan Institute for Public Health, Department of Microbiology<br/> Shinkai, Takayuki; Tokyo Metropolitan Institute for Public Health, Department of Microbiology<br/> Sadamasu, Kenji; Tokyo Metropolitan Institute for Public Health, Department of Microbiology<br/> Watanabe, Koji; National Center for Global Health and Medicine Hospital, AIDS Clinical Center; National Institute of Infectious Diseases, Department of Parasitology</p> |
| Keywords:                     | PARASITOLOGY, Epidemiology < INFECTIOUS DISEASES, Tropical medicine < INFECTIOUS DISEASES, Diagnostic microbiology < INFECTIOUS DISEASES, Public health < INFECTIOUS DISEASES, SEXUAL MEDICINE                                                                                                                                                                                                                                                                                                                                                                                                                                                                                                                                                                                                                                                                                                                                                                                                                                                                                                                                                                             |
|                               |                                                                                                                                                                                                                                                                                                                                                                                                                                                                                                                                                                                                                                                                                                                                                                                                                                                                                                                                                                                                                                                                                                                                                                            |

SCHOLARONE™  
Manuscripts

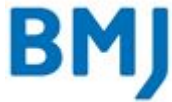

I, the Submitting Author has the right to grant and does grant on behalf of all authors of the Work (as defined in the below author licence), an exclusive licence and/or a non-exclusive licence for contributions from authors who are: i) UK Crown employees; ii) where BMJ has agreed a CC-BY licence shall apply, and/or iii) in accordance with the terms applicable for US Federal Government officers or employees acting as part of their official duties; on a worldwide, perpetual, irrevocable, royalty-free basis to BMJ Publishing Group Ltd ("BMJ") its licensees and where the relevant Journal is co-owned by BMJ to the co-owners of the Journal, to publish the Work in this journal and any other BMJ products and to exploit all rights, as set out in our [licence](#).

The Submitting Author accepts and understands that any supply made under these terms is made by BMJ to the Submitting Author unless you are acting as an employee on behalf of your employer or a postgraduate student of an affiliated institution which is paying any applicable article publishing charge ("APC") for Open Access articles. Where the Submitting Author wishes to make the Work available on an Open Access basis (and intends to pay the relevant APC), the terms of reuse of such Open Access shall be governed by a Creative Commons licence – details of these licences and which [Creative Commons](#) licence will apply to this Work are set out in our licence referred to above.

Other than as permitted in any relevant BMJ Author's Self Archiving Policies, I confirm this Work has not been accepted for publication elsewhere, is not being considered for publication elsewhere and does not duplicate material already published. I confirm all authors consent to publication of this Work and authorise the granting of this licence.

1  
2  
3 1 **Research article**

4  
5 2 **Title:**

6  
7 3 **Higher seroprevalence of *Entamoeba histolytica* than that of HIV-1 at a voluntary**  
8  
9 4 **counselling and testing centre in Tokyo**

10  
11 5  
12  
13  
14 6 Yasuaki Yanagawa <sup>1,2#</sup>, Mami Nagashima <sup>3#</sup>, Hiroyuki Gatanaga <sup>1,4</sup>, Yoshimi Kikuchi <sup>1</sup>, Shinichi  
15  
16 7 Oka <sup>1,4</sup>, Keiko Yokoyama <sup>3</sup>, Takayuki Shinkai <sup>3</sup>, Kenji Sadamasu <sup>3</sup>, and Koji Watanabe <sup>1,2\*</sup>

17  
18 8  
19  
20  
21 9 1. National Center for Global Health and Medicine, Tokyo, Japan

22  
23 10 2. National Institute of Infectious Diseases, Tokyo, Japan

24  
25 11 3. Tokyo Metropolitan Institute of Public Health, Shijuku, Tokyo, Japan

26  
27 12 4. Kumamoto University, Kumamoto, Japan

28  
29 13 # These authors contributed equally to this article.

30  
31 14  
32  
33 15 **\* Corresponding author :**

34  
35 16 Koji Watanabe, AIDS Clinical Center, National Center for Global Health and Medicine. 1-21-1,  
36  
37 17 Toyama, Shinjuku-ku, Tokyo 162-8655, Japan

38  
39 18 Tel: +81-3-3202-7181, Fax: +81-3-5273-6483, E-mail: kwatanab@acc.ncgm.go.jp

40  
41 19  
42  
43 20 **# Institutional addresses of authors.** Yasuaki Yanagawa, AIDS Clinical Center, National

44  
45 21 Center of Global Health and Medicine, Tokyo, Japan. Department of Parasitology, National

46  
47 22 Institutes of Infectious Diseases, Tokyo, Japan. Mami Nagashima, Department of Microbiology,

48  
49 23 Tokyo Metropolitan Institute of Public Health, Tokyo, Japan. Hiroyuki Gatanaga, AIDS Clinical

1  
2  
3 24 Center, National Center of Global Health and Medicine, Tokyo, Japan. Center for AIDS  
4  
5 25 Research, Kumamoto University, Kumamoto, Japan. Yoshimi Kikuchi, AIDS Clinical Center,  
6  
7 26 National Center of Global Health and Medicine, Tokyo, Japan. Shinichi Oka, AIDS Clinical  
8  
9  
10 27 Center, National Center of Global Health and Medicine, Tokyo, Japan. Center for AIDS  
11  
12 28 Research, Kumamoto University, Kumamoto, Japan. Keiko Yokoyama, Department of  
13  
14 29 Microbiology, Tokyo Metropolitan Institute of Public Health, Tokyo, Japan. Takayuki Shinkai,  
15  
16 30 Department of Microbiology, Tokyo Metropolitan Institute of Public Health, Tokyo, Japan.  
17  
18 31 Kenji Sadamasu, Department of Microbiology, Tokyo Metropolitan Institute of Public Health,  
19  
20 32 Tokyo, Japan. Koji Watanabe, AIDS Clinical Center, National Center of Global Health and  
21  
22 33 Medicine, Tokyo, Japan. Department of Parasitology, National Institutes of Infectious Diseases,  
23  
24 34 Tokyo, Japan.  
25  
26  
27  
28  
29  
30

31 **Word counts.** abstract 249 words, manuscript 2,727 words  
32  
33  
34  
35

36 **Keywords:** Parasitology, Epidemiology, Tropical medicine, Diagnostic microbiology, Public  
37  
38 health, Sexual medicine.  
39  
40  
41

42 **Footnotes:** Preliminary results from this study were presented at ASM Microbe 2018, convened  
43  
44  
45 42 June 7-11, 2018, in Atlanta, GA, USA.  
46  
47  
48  
49  
50  
51  
52  
53  
54  
55  
56  
57  
58  
59  
60

1  
2  
3 **43 Abstract (249 words)**  
4

5 **44 Background** Amebiasis, which is caused by *Entamoeba histolytica*, is a re-emerging public  
6  
7  
8 **45** health issue owing to sexually transmitted infection (STI) in Japan. However, epidemiological  
9  
10 **46** data are quite limited.

11  
12 **47 Methods** To reveal the relative prevalence of sexually transmitted *E. histolytica* infection to  
13  
14  
15 **48** other STIs, we conducted a cross-sectional study at a voluntary counselling and testing (VCT)  
16  
17 **49** centre in Tokyo. Seroprevalence of *E. histolytica* was assessed according to positivity with an  
18  
19 **50** enzyme-linked immunosorbent assay for *E. histolytica*-specific IgG in serum samples collected  
20  
21 **51** from anonymous VCT clients.

22  
23  
24 **52 Results** Among 2,083 samples, seropositive rate for *E. histolytica* was 2.64%, which was higher  
25  
26 **53** than that for HIV-1 (0.34%,  $p < 0.001$ ) and comparable to that for syphilis (rapid plasma reagin  
27  
28 **54** (RPR) 2.11%,  $p = 0.31$ ). Positivity for *Chlamydia trachomatis* in urine by transcription-mediated  
29  
30 **55** amplification (TMA) was 4.59%. Seropositivity for *E. histolytica* was high among RPR- or  
31  
32 **56** *Treponema pallidum* hemagglutination (TPHA)-positive individuals and it was not different  
33  
34  
35 **57** between clients with and without other STIs. Both seropositivity of *E. histolytica* and RPR were  
36  
37 **58** high among male clients. The seropositive rate for anti-*E. histolytica* antibody was positively  
38  
39 **59** correlated with age. TMA positivity for urine *C. trachomatis* was high among female clients and  
40  
41 **60** negatively correlated with age. Regression analysis identified that male sex, older age, and  
42  
43  
44 **61** TPHA-positive results are independent risk factors of *E. histolytica* seropositivity.  
45  
46

47 **62 Conclusion** Seroprevalence of *E. histolytica* was 7.9 times higher than that of HIV-1 at a VCT  
48  
49 **63** centre in Tokyo, with a tendency to be higher among people at risk for syphilis infection.  
50  
51

52 **64**  
53  
54  
55  
56  
57  
58  
59  
60

### 65 **Strengths and limitations of this study**

- 66 ➤ This study is the first examining the seroprevalence of *E. histolytica* at a voluntary  
67 counselling and testing (VCT) centre in Tokyo, because of the lack of active surveillance for  
68 *E. histolytica* infection, including asymptotically infected individuals.
- 69 ➤ Our findings provided epidemiological evidences that the seropositive rate for *E. histolytica*  
70 was significantly 7.9 times higher than that of HIV-1, and was comparable to that for active  
71 syphilis infection. It was strongly associated with male sex, older age, and TPHA-  
72 positive result.
- 73 ➤ This study design was a cross-sectional study of anonymous clients at a VCT centre. We  
74 could not assess risk behaviour or sexual behaviour, and exclude the possibility of selection  
75 bias of clients. Further studies are needed to evaluate these factors.
- 76 ➤ To assess seroprevalence of *E. histolytica* in general population, more appropriate sampling  
77 locations should be identified, such as STI clinics that are visited by female commercial sex  
78 workers. This study population predominantly consisted of male (70.8%).

1  
2  
3 81 **Text (2,727 words)**  
4

5  
6 82 **INTRODUCTION**  
7

8 83 Amebiasis is an enteric protozoa infection caused by *Entamoeba histolytica*. Up to 80% of  
9  
10 84 *E. histolytica* infections are asymptomatic but persistent; the remainder result in the development  
11  
12 85 of invasive diseases, such as colitis and liver abscess [1]. Asymptomatically infected individuals  
13  
14 86 represent a risk to the community because they are a source of new infections. Transmission  
15  
16 87 occurs via the oral–faecal route. It has long been believed that amebiasis is only endemic in  
17  
18 88 developing countries where food and water are frequently contaminated with human faeces, or  
19  
20 89 that it occurs among travellers to or immigrants from these countries [1, 2]. However, in the  
21  
22 90 previous two decades, it has been reported that cases of amebiasis have been rapidly increasing  
23  
24 91 and have become a re-emerging infectious disease not only in developed countries of East Asia  
25  
26 92 but also in European developed countries [3-12]. Human-to-human transmission occurs via  
27  
28 93 direct sexual contact, such as oral–anal sexual contact and contact among men who have sex  
29  
30 94 with men in these countries [13, 14]. Under such circumstances, it is essential to identify  
31  
32 95 individuals who are asymptomatic but chronically infected with *E. histolytica* and who thus  
33  
34 96 represent sources of new infection, for the epidemiologic control of sexually transmitted *E.*  
35  
36 97 *histolytica* infection. However, little epidemiological data is currently available in Japan, other  
37  
38 98 than that from National Epidemiological Surveillance of Infectious Diseases (NESID), which  
39  
40 99 only reports clinically diagnosed “symptomatic” cases. Moreover, it is critical to understand the  
41  
42 100 epidemiology of sexually transmitted *E. histolytica* infection before the upcoming Tokyo  
43  
44 101 Olympics in 2020, which could serve as a source of the rapid spread of such neglected  
45  
46 102 communicable diseases.  
47  
48  
49  
50  
51  
52  
53  
54  
55  
56  
57  
58  
59  
60



1  
2  
3 103 In the present study, we investigated the seroprevalence of *E. histolytica* at a voluntary  
4  
5 104 counselling and testing (VCT) centre in Tokyo, in comparison with the prevalence of other  
6  
7  
8 105 sexually transmitted infections (STIs). In addition, we discuss future strategies for the  
9  
10 106 epidemiologic control of sexually transmitted *E. histolytica* infection.

## 11 12 107 **METHODS**

### 13 14 15 108 **Setting**

16  
17 109 Tokyo, the capital city of Japan, is located on the Pacific on the eastern coast of Honshu,  
18  
19  
20 110 the largest of the four main islands comprising Japan. According to the national surveillance  
21  
22 111 system, the annual number of HIV tests performed and the incidence rates of HIV infection are  
23  
24 112 higher in Tokyo than those of other prefectures [15]. The Tokyo Metropolitan Minami Shinjuku  
25  
26 113 Testing – Counselling Centre is the largest HIV testing centre in Tokyo, and it is very close to a  
27  
28 114 town in Shinjuku with a large population of men who have sex with men (MSM) [16]. Because  
29  
30 115 there are more MSM who visit this centre to undergo testing for HIV and other STIs, the  
31  
32 116 incidence rate of HIV infection at this centre is higher than that of other public health centres in  
33  
34  
35 117 Tokyo [17].

### 36 37 38 118 **Study population, samples, and ethics issues**

39  
40 119 The design of this study was a cross-sectional study. The total 2,083 serum samples used in  
41  
42 120 this study were collected at the Tokyo Metropolitan Minami Shinjuku Testing – Counselling  
43  
44 121 Centre where more than 10,000 anonymous clients seek HIV-1 screening tests each year.  
45  
46 122 Collected samples are transferred to the Tokyo Metropolitan Institute of Public Health for  
47  
48 123 laboratory testing, then stored at 4°C. Fourth generation HIV-1 screening is performed routinely  
49  
50 124 throughout the year. However, in 2 months of the year (e.g., June and December in the case of  
51  
52  
53  
54  
55  
56  
57  
58  
59  
60

1  
2  
3 125 2017), the Tokyo Metropolitan Government intensifies STI screening, and rapid plasma reagin  
4  
5 126 (RPR) and *Treponema pallidum* hemagglutination (TPHA) tests for syphilis screening are  
6  
7 127 additionally performed for all clients. In addition, urinary sampling and transcription-mediated  
8  
9 128 amplification (TMA) assay testing for *Chlamydia trachomatis* and *Neisseria gonorrhoeae* are  
10  
11 129 performed for clients who are willing to undergo these tests. Therefore, we assessed the  
12  
13 130 seroprevalence of anti-*E. histolytica* antibody using stored serum samples collected in June and  
14  
15 131 December of 2017 and compared this with the positivity for other STIs in the present study. In  
16  
17 132 the present study, there was no selection bias or missing data.

18  
19 133 This study was approved by the ethics committee of the National Center for Global Health  
20  
21 134 and Medicine (NCGM-2302) and Tokyo Metropolitan Institute of Public Health (29-875). All  
22  
23 135 protocols for this study were conducted in accordance with the Declaration of Helsinki.

### 24 136 **Laboratory testing**

25  
26 137 The presence of anti-*E. histolytica* antibody was detected using a commercially available  
27  
28 138 ELISA kit (*Entamoeba histolytica* IgG-ELISA; GenWay Biotech, Inc., San Diego, CA. USA).  
29  
30 139 All procedures were performed according to the manufacturer's instructions. In brief, diluted  
31  
32 140 serum samples (100X dilution in IgG sample diluent) as well as 5 control samples, consisting of  
33  
34 141 1 substrate blank, 1 negative control, 2 cut-off controls, and 1 positive control, were applied to  
35  
36 142 96-well plates pre-treated with *E. histolytica* antigen and incubated at 37°C for 1 hour. After  
37  
38 143 washing the plates using washing solution, 100 µL of *E. histolytica* Protein A conjugate was  
39  
40 144 added to all wells except the substrate blank and incubated for 30 minutes in the dark. After a  
41  
42 145 second wash, TMB (3,3',5,5'-Tetramethylbenzidine) substrate solution was added to all wells.

1  
2  
3 146 After a 15-minute incubation, 100  $\mu$ L of stop solution was applied to the plates, and absorbance  
4  
5  
6 147 of the specimen was then read at 450/620 nm using a spectrometer.

### 8 148 **Statistical analysis**

9  
10 149 Of the total samples tested in each STI screening test, the proportion of seropositive blood  
11  
12 150 and urine samples are presented with 95% confidence interval (CIs) calculated using the Wilson–  
13  
14  
15 151 Brown method. The seroprevalence of *E. histolytica* was compared with that of other sexually  
16  
17 152 transmitted infections using Fisher’s exact test. To determine the trend of seropositivity among  
18  
19 153 age groups, we used the chi-square test for trend. Statistical significance was defined as a two-  
20  
21  
22 154 sided p value < 0.05. All statistical analyses were conducted using GraphPad Prism (GraphPad  
23  
24 155 Software, La Jolla, CA, USA). Logistic regression analysis for identification of factors  
25  
26 156 influencing *E. histolytica* seropositivity was performed using Stata (StataCorp LLC., College  
27  
28 157 Station, TX, USA).

### 31 158 **Patient and public involvement**

32  
33 159 Patients and public were not involved in the design and conduct of this research.

## 36 160 **RESULTS**

### 38 161 **Study population and seroprevalence of *E. histolytica* at a voluntary counselling and testing** 39 40 162 **centre in Tokyo**

41  
42  
43 163 In total, 2,083 samples were analysed. The average age of clients was 35.2 (95% CI: 34.8–  
44  
45 164 35.7) years, and 70.8% (1474/2083) were male (Fig 1). The overall seropositive rate for *E.*  
46  
47 165 *histolytica* was 2.64%; this was significantly higher than that for HIV-1 (0.34%) and the  
48  
49  
50 166 comparable level as that for syphilis by RPR (2.11%) (Fig 2A). The positive rate of urinary TMA  
51  
52 167 for *C. trachomatis* (4.59%) was higher than that for *E. histolytica*; however, urinary TMA testing

1  
2  
3 168 for *C. trachomatis* and *N. gonorrhoeae* was only carried out in 69.0% (1,437/2,083) of clients,  
4  
5 169 i.e., those who were willing to undergo TMA testing. These results suggest that *E. histolytica* is a  
6  
7 170 more common STI than HIV-1 in Tokyo and is at a level comparable to that of syphilis infection.  
8  
9  
10 171 Interestingly, all individuals who were seropositive for *E. histolytica* were seronegative for HIV-  
11  
12 172 1 (Fig 2B). Furthermore, the seropositive rate for *E. histolytica* was significantly higher among  
13  
14 173 people who were seropositive for syphilis infection (by both RPR and TPHA) than among those  
15  
16 174 who were seronegative for syphilis; no significant differences in *E. histolytica* seropositivity  
17  
18 175 were seen according to TMA positivity for *C. trachomatis*. These results indicate that *E.*  
19  
20 176 *histolytica* infection is spreading among people at risk for syphilis infection.  
21  
22  
23

#### 24 177 **Differences in seropositivity by sex and age group**

25  
26 178 Next, we compared positivity for STIs between male and female clients. The seropositive  
27  
28 179 rate for *E. histolytica* was significantly higher in male (3.46%) than in female (0.66%) clients, as  
29  
30 180 seen for syphilis infection (RPR: 2.78% vs. 0.49% and TPHA: 9.29% vs. 0.82%) (Fig 3A). The  
31  
32 181 proportion of urinary TMA results positive for *C. trachomatis* was significantly higher in female  
33  
34 182 (8.77%) than male (2.65%) clients. However, it is difficult to simply compare the TMA  
35  
36 183 positivity by sex because persistent, asymptomatic *C. trachomatis* infection of the urinary tract  
37  
38 184 occurs more frequently in females [18-21]. Moreover, the age of female clients was significantly  
39  
40 185 lower than that of males, and the proportion of clients aged 29 years or less in females was  
41  
42 186 53.4% whereas that in males was only 29.6% (Fig 1). These results indicate that both male and  
43  
44 187 female clients in this study are at risk for STIs; however, the predominant pathogens might differ  
45  
46 188 between relatively older males (*E. histolytica* and *T. pallidum*) and relatively younger females  
47  
48 189 (*C. trachomatis*).  
49  
50  
51  
52  
53  
54  
55  
56  
57  
58  
59  
60

1  
2  
3 190 To determine the trend of *E. histolytica* seropositivity by age, we compared seropositivity  
4  
5 191 for *E. histolytica* in different age groups. Interestingly, the seropositive rates for anti-*E.*  
6  
7 192 *histolytica* antibody and RPR was highest among clients aged 50 years or older (5.41% and  
8  
9 193 2.70%, respectively). Moreover, a positive correlation was observed between age and  
10  
11 194 seropositivity for *E. histolytica* (Fig 3B). Positive urinary TMA for *C. trachomatis* was highest  
12  
13 195 among clients aged 29 years or younger (8.35%) and showed a negative correlation with age.  
14  
15 196 These results are consistent with national surveillance data, in which diagnosed cases of  
16  
17 197 *Chlamydia* infection have a peak in the 20s [22], whereas the median age of reported cases of  
18  
19 198 amebiasis is relatively high (50 years in men and 40 years in women) [5, 20]. Considering these  
20  
21 199 findings, *E. histolytica* infection might be more prevalent among relatively older age groups (40  
22  
23 200 years or more) whereas *Chlamydia* infection is more prevalent in relatively younger populations.

### 201 **Risk of seropositivity for *E. histolytica***

202 Finally, to identify the risk factors of seropositivity for *E. histolytica*, we performed  
203 logistic regression analysis using data of client characteristics and the results of STI screening  
204 tests. Univariate and multivariate regression analyses revealed that male sex, a history of syphilis  
205 infection (by TPHA), and older age were independent risk factors of seropositivity for *E.*  
206 *histolytica* (Table 1). In particular, age 40 years or older was a high-risk factor of seropositivity  
207 for *E. histolytica* (odds ratio 3.31 in people aged less than 40 years, p value < 0.001 by univariate  
208 analysis; data not shown). In addition, univariate analysis showed that positive RPR was a high-  
209 risk factor for *E. histolytica* seropositivity; however, this was diminished in multivariate analysis  
210 owing to the strong association with TPHA positivity. Univariate analysis using preliminary  
211 urinary TMA data of 1,437 participants showed that positivity for *C. trachomatis* in the urine had  
212 no impact on *E. histolytica* seropositivity (Table 1). We could not include HIV-1 serology and

1  
2  
3 213 TMA positivity for *N. gonorrhoeae* in urine in the logistic regression analyses because no clients  
4  
5 214 who were HIV-1 seropositive or positive for *N. gonorrhoeae* by TMA were also seropositive for  
6  
7 215 *E. histolytica*.  
8  
9  
10  
11  
12  
13  
14  
15  
16  
17  
18  
19  
20  
21  
22  
23  
24  
25  
26  
27  
28  
29  
30  
31  
32  
33  
34  
35  
36  
37  
38  
39  
40  
41  
42  
43  
44  
45  
46  
47  
48  
49  
50  
51  
52  
53  
54  
55  
56  
57  
58  
59  
60

For peer review only

216  
217 **Table 1. Impact of individual characteristics of seropositivity for *Entamoeba histolytica*,**  
218 **Tokyo.**

|  |                                                | Univariate analysis  |         | Multivariate analysis*** |         |
|--|------------------------------------------------|----------------------|---------|--------------------------|---------|
|  |                                                | OR                   | p value | OR                       | p value |
|  |                                                | (95% CI)             |         | (95% CI)                 |         |
|  | Sex (Male)                                     | 5.42<br>(1.95–15.06) | < 0.001 | 3.17<br>(1.10–9.07)      | 0.032   |
|  | Older age<br>(by 10-year age groups)           | 1.66<br>(1.33–2.08)  | < 0.001 | 1.49<br>(1.17–1.90)      | 0.001   |
|  | HIV-1 positive                                 | ND**                 |         |                          |         |
|  | Syphilis infection                             |                      |         |                          |         |
|  | RPR positive                                   | 5.1<br>(1.93–13.49)  | 0.006   | 1.26<br>(0.41–3.89)      | 0.693   |
|  | TPHA positive                                  | 6.19<br>(3.37–11.39) | < 0.001 | 4.30<br>(2.11–8.76)      | < 0.001 |
|  | Urine <i>C. trachomatis</i> (TMA)<br>positive* | 1.93<br>(0.58–6.47)  | 0.326   |                          |         |
|  | Urine <i>N. gonorrhoeae</i> (TMA)<br>positive* | ND**                 |         |                          |         |

219 \* Data of urinary TMA testing available only for 69.0% (1,437 of 2,083) of total clients.

220 \*\* Odds ratios could not be determined in logistic regression analysis because all clients who  
221 were HIV-1 positive and/or positive for gonorrhoea by TMA were *E. histolytica* seronegative.

222 \*\*\* Multivariate analysis for age and sex, plus factors with  $p < 0.05$  in univariate analysis.

223 Abbreviations: OR, odds ratio; RPR, rapid plasma reagin; TPHA, *Treponema pallidum*  
224 hemagglutination; TMA, transcription-mediated amplification; ND, not determined.

## 225 226 **DISCUSSION**

227       The most important finding of the present study was that the seroprevalence of *E.*  
228 *histolytica* was significantly (7.9 times) higher than that of HIV-1 and it was comparable to that  
229 for syphilis (by RPR). Certainly, it is difficult to simply compare seropositivity among these  
230 three tests; the HIV-1 screening test continues to be positive for a person's entire life whereas  
231 positivity in RPR and anti-*E. histolytica* antibody tests indicate current or recent infection [21,  
232 22]. However, these results strongly indicate that the endemicity of *E. histolytica* in Tokyo is  
233 higher than that of HIV-1 and close to the level of syphilis. In contrast to our seroprevalence  
234 data, the national surveillance data of Japan from NESID pragmatically show that the annual  
235 number of diagnosed cases of amebiasis (1,151 in 2016) is not only much lower than that of  
236 syphilis (4,575 cases), it is also lower than that of HIV-1 (1,443 cases) [22, 23]. Our results  
237 suggest that the endemicity of amebiasis in Japan is currently underestimated, thereby remaining  
238 a neglected disease in Japan despite frequently reported life-threatening cases of amebiasis [26-  
239 29]. Interestingly, in the present study, all individuals who were seropositive for *E. histolytica*  
240 were HIV-1 negative whereas regression analysis identified that seropositivity for syphilis by  
241 TPHA was an independent risk factor of a positive result for anti-*E. histolytica* antibody.  
242 Previous reports have emphasized the high seroprevalence of *E. histolytica* [30] and increasing  
243 number of amebiasis cases [31-33] among individuals with HIV-1 infection. Although the  
244 epidemiological trend of *E. histolytica* among HIV-1-positive individuals could not be assessed  
245 in this study owing to the small number of clients who were positive for HIV-1, it should be  
246 noted that sexually transmitted *E. histolytica* infection is currently spreading even among HIV-1-



1  
2  
3 247 negative populations, as we indicated in our previous hospital-based cross-sectional analysis  
4  
5 248 [34]. Currently, screening for *E. histolytica* is not routinely performed at VCT centres in Japan;  
6  
7  
8 249 however, public health interventions should be considered to control sexually transmitted *E.*  
9  
10 250 *histolytica* infection.

11  
12 251 The clinical significance of seropositivity for *E. histolytica* remains unclear and is beyond  
13  
14 252 the scope of this paper. Serologic testing is a sensitive diagnostic method for symptomatic  
15  
16  
17 253 invasive amebiasis; however, positive results are also obtained for recent infections, up to the  
18  
19 254 previous several years [27]. However, we previously reported that 70.4% of *E. histolytica*-  
20  
21 255 seropositive individuals did not have any amebiasis-related symptoms nor any history of  
22  
23  
24 256 treatment for amebiasis. Interestingly, 20% of such individuals in a Japanese HIV-1 cohort  
25  
26 257 developed symptomatic invasive amebiasis within a 1-year follow-up period [27]. In another  
27  
28 258 cross-sectional analysis, we also reported that ulcerative lesions owing to *E. histolytica* in the  
29  
30 259 large intestine are frequently identified (7/18, 38.9%) by colonoscopy among asymptomatic  
31  
32  
33 260 individuals who are *E. histolytica* seropositive whereas these rarely (1/53, 1.9%) occur among *E.*  
34  
35 261 *histolytica*-seronegative people [35]. Serologic screening for *E. histolytica* at VCT centres,  
36  
37 262 followed by diagnosis of subclinical *E. histolytica* infection by colonoscopy and treatment at a  
38  
39 263 referral hospital, is one possible public health strategy against sexually transmitted *E. histolytica*  
40  
41 264 infection. However, we must assess the utility of serologic testing for the screening of  
42  
43  
44 265 asymptomatic *E. histolytica* in well-designed prospective analyses in the future.

45  
46 266 The present study has some limitations that should be considered. First, this preliminary  
47  
48 267 investigation was a cross-sectional study of anonymous clients at a VCT centre. We could not  
49  
50  
51 268 assess risk behaviour or sexual behaviour with respect to seropositivity for *E. histolytica* owing  
52  
53  
54 269 to a lack of detailed data on the characteristics of clients. In addition, the study periods were 2

1  
2  
3 270 months apart owing to the availability of data for not only HIV-1 but also other STIs (serum tests  
4  
5 271 for syphilis and urine tests for chlamydia and gonorrhoea). We could not exclude the possibility  
6  
7 272 of selection bias of clients, such as those who undergo repeat testing. Second, anti-*E. histolytica*  
8  
9 273 antibody was screened using stored serum. Long periods of storage could lead to lower  
10  
11 274 sensitivity of serologic tests, resulting in underestimation of the seroprevalence of *E. histolytica*.  
12  
13 275 Third, we obtained a considerably lower seropositive rate for *E. histolytica* among female clients  
14  
15 276 (0.66%, 4/609) than that among males (3.46%, 51/1,474). This probably results from the fact that  
16  
17 277 VCT centres may not be appropriate for identifying female populations at high risk for *E.*  
18  
19 278 *histolytica* infection; our female clients were relatively younger and had lower seropositive rates  
20  
21 279 in RPR and TPHA tests. More appropriate sampling locations should be identified, such as STI  
22  
23 280 clinics that are visited by female commercial sex workers [36].

24  
25  
26  
27  
28 281 In conclusion, among clients of a VCT centre in Tokyo, seropositivity for *E. histolytica*  
29  
30 282 was 7.9 times higher than that of HIV-1 and tended to be high among individuals at risk of  
31  
32 283 syphilis infection. Active detection and treatment of asymptomatic cases of *E. histolytica*  
33  
34 284 infection should be considered for the epidemiologic control of sexually transmitted *E.*  
35  
36 285 *histolytica* infection in Japan.

37 286

38 287

## 39 288 **Acknowledgements**

40  
41  
42 289 We thank Analisa Avila, ELS, of Edanz Group ([www.edanzediting.com/ac](http://www.edanzediting.com/ac)) for editing a  
43  
44 290 draft of this manuscript.

45 291

1  
2  
3 **292 Contributors**  
4

5  
6 293 Conception or design on the work: YY, HG, YK, SO, MN, KY, TS, KS, KW. Data collection:  
7  
8 294 MN, KY, TS, KS. Data analysis and interpretation: YY, MN, KY, TS, KS, KW. Drafting the  
9  
10 295 article: YY, MN, KW. Critical revision of the article: YY, KW. Final approval of the version to  
11  
12 296 be published: YY, HG, YK, SO, MN, KY, TS, KS, KW.  
13  
14

15 297  
16  
17 **298 Competing Interests**  
18

19  
20 299 None.  
21  
22

23 300

24  
25 **301 Patient Consent**  
26

27 302 Not acquired.  
28  
29

30 303

31  
32 **304 Funding information**  
33

34  
35 305 This work was supported by the Emerging/Re-emerging Infectious Diseases Project of Japan  
36  
37 306 from the Japan Agency for Medical Research and Development (AMED) under Grant Number  
38  
39 307 18fk0108046, and a grant from the National Center for Global Health and Medicine (29-2013).  
40

41 308  
42  
43

44 **309 Data sharing statement**  
45

46 310 No additional data available.  
47  
48

49 311

50  
51 **312 References**  
52

53  
54 313 1. Haque R, Huston CD, Hughes M, et al. Amebiasis. *N Engl J Med*. 2003;348:1565-73.  
55

- 1  
2  
3 314 2. Stanley SL, Jr. Amoebiasis. *Lancet*. 2003;361:1025-34.  
4  
5 315 3. Hung CC, Chang SY, Ji DD. *Entamoeba histolytica* infection in men who have sex with  
6  
7 316 men. *Lancet Infect Dis*. 2012;12:729-36.  
8  
9 317 4. Wu H, Wu PY, Li SY, et al. Maximising the potential of voluntary counselling and  
10  
11 318 testing for HIV: sexually transmitted infections and HIV epidemiology in a population  
12  
13 319 testing for HIV and its implications for practice. *Sex Transm Infect*. 2012;88:612-6.  
14  
15 320 5. Ishikane M, Arima Y, Kanayama A, et al. Epidemiology of Domestically Acquired  
16  
17 321 Amebiasis in Japan, 2000-2013. *Am J Trop Med Hyg*. 2016;94:1008-14.  
18  
19 322 6. Park WB, Choe PG, Jo JH, et al. Amebic liver abscess in HIV-infected patients, Republic  
20  
21 323 of Korea. *Emerg Infect Dis*. 2007;13:516-7.  
22  
23 324 7. Stark D, van Hal SJ, Matthews G, et al. Invasive amoebiasis in men who have sex with  
24  
25 325 men, Australia. *Emerg Infect Dis*. 2008;14:1141-3.  
26  
27 326 8. Oh MD, Lee K, Kim E, et al. Amoebic liver abscess in HIV-infected patients. *AIDS*.  
28  
29 327 2000;14:1872-3.  
30  
31 328 9. Spinzi G, Pugliese D, Filippi E. An Unexpected Cause of Chronic Diarrhea.  
32  
33 329 *Gastroenterology*. 2016;150(1): e5-6.  
34  
35 330 10. Escola-Verge L, Arando M, Vall M, et al. Outbreak of intestinal amoebiasis among men  
36  
37 331 who have sex with men, Barcelona (Spain), October 2016 and January 2017. *Euro*  
38  
39 332 *Surveill* 2017; 22(30).  
40  
41 333 11. Roure S, Valerio L, Soldevila L, et al. Approach to amoebic colitis: Epidemiological,  
42  
43 334 clinical and diagnostic considerations in a non-endemic context (Barcelona, 2007-2017).  
44  
45 335 *PLoS One* 2019; 14(2): e0212791.  
46  
47 336 12. Timsit BL, Deroux A, Lugosi M, et al. Amoebosis: May sexual transmission be an  
48  
49 337 underestimated way of contamination?. *Rev Med Interne* 2018; 39(7): 586-8.  
50  
51 338 13. Hung CC, Wu PY, Chang SY, et al. Amebiasis among persons who sought voluntary  
52  
53 339 counseling and testing for human immunodeficiency virus infection: a case-control study.  
54  
55 340 *Am J Trop Med Hyg*. 2011;84:65-9.  
56  
57 341 14. Lo YC, Ji DD, Hung CC. Prevalent and incident HIV diagnoses among *Entamoeba*  
58  
59 342 *histolytica*-infected adult males: a changing epidemiology associated with sexual  
60  
343 transmission--Taiwan, 2006-2013. *PLoS Negl Trop Dis*. 2014;8:e3222.

- 1  
2  
3 344 15. Ministry of Health, Labor and Welfare [internet]. Tokyo: AIDS Surveillance Committee;  
4 345 c2017. [cited 2018 Aug 27]. Available from: [http://api-](http://api-net.jfap.or.jp/status/2017/17nenpo/17nenpo_menu.html)  
5 346 [net.jfap.or.jp/status/2017/17nenpo/17nenpo\\_menu.html](http://api-net.jfap.or.jp/status/2017/17nenpo/17nenpo_menu.html)  
6  
7  
8 347 16. Ministry of Health, Labor and Welfare [internet]. Tokyo: AIDS Surveillance Committee;  
9 348 c2017. [cited 2018 Aug 27]. Available from: [http://api-](http://api-net.jfap.or.jp/status/2017/17nenpo/kensa.pdf)  
10 349 [net.jfap.or.jp/status/2017/17nenpo/kensa.pdf](http://api-net.jfap.or.jp/status/2017/17nenpo/kensa.pdf)  
11  
12  
13 350 17. Ministry of Health, Labor and Welfare [internet]. Tokyo: AIDS Surveillance Committee;  
14 351 c2017. [cited 2018 Aug 27]. Available from: [http://api-](http://api-net.jfap.or.jp/status/2017/17nenpo/hyo_09_02.pdf)  
15 352 [net.jfap.or.jp/status/2017/17nenpo/hyo\\_09\\_02.pdf](http://api-net.jfap.or.jp/status/2017/17nenpo/hyo_09_02.pdf)  
16  
17  
18 353 18. Morre SA, van den Brule AJ, Rozendaal L, et al. The natural course of asymptomatic  
19 354 *Chlamydia trachomatis* infections: 45% clearance and no development of clinical PID  
20 355 after one-year follow-up. *Int J STD AIDS*. 2002;13(Suppl 2):12-8.  
21  
22  
23 356 19. Wiesenfeld HC. Screening for *Chlamydia trachomatis* Infections in Women. *N Engl J*  
24 357 *Med*. 2017;376:765-73.  
25  
26  
27 358 20. Cecil JA, Howell MR, Tawes JJ, et al. Features of *Chlamydia trachomatis* and *Neisseria*  
28 359 *gonorrhoeae* infection in male Army recruits. *J Infect Dis*. 2001;184:1216-9.  
29  
30  
31 360 21. Detels R, Green AM, Klausner JD, et al. The incidence and correlates of symptomatic  
32 361 and asymptomatic *Chlamydia trachomatis* and *Neisseria gonorrhoeae* infections in  
33 362 selected populations in five countries. *Sex Transm Dis*. 2011;38:503-9.  
34  
35  
36 363 22. Ministry of Health Law. Annual reported cases of sexually transmitted infections in  
37 364 Japan [in Japanese]. [cited 2018 Sep]. Available from:  
38 365 <https://www.mhlw.go.jp/topics/2005/04/tp0411-1.html>  
39  
40  
41 366 23. National Institute of Infectious Diseases. Infectious Agents Surveillance Report. Annual  
42 367 reported cases of Category V Infectious Diseases in Japan [in Japanese]. [cited 2018  
43 368 Sep ]. Available from: <https://www.mhlw.go.jp/topics/2005/04/tp0411-1.html>  
44  
45  
46 369 24. Gonzalez CR, Isibasi A, Ortiz-Navarrete V, et al. Prevalence of antibodies against  
47 370 *Entamoeba histolytica* in Mexico measured by ELISA. *Epidemiol Infect*. 1995;115:535-  
48 371 43.  
49  
50  
51 372 25. Romanowski B, Sutherland R, Fick GH, et al. Serologic response to treatment of  
52 373 infectious syphilis. *Ann Intern Med*. 1991;114:1005-9.  
53  
54  
55  
56  
57  
58  
59  
60

- 1  
2  
3 374 26. Goto M, Mizushima Y, Matsuoka T. Fulminant amoebic enteritis that developed in the  
4 375 perinatal period. *BMJ Case Rep*. 2015 Jan;2015.  
5  
6 376 27. Ito D, Hata S, Seiichiro S, et al. Amebiasis presenting as acute appendicitis: Report of a  
7 377 case and review of Japanese literature. *Int J Surg Case Rep*. 2014;5:1054-7.  
8  
9 378 28. Kobayashi T, Watanabe K, Yano H, et al. Underestimated Amoebic Appendicitis among  
10 379 HIV-1-Infected Individuals in Japan. *J Clin Microbiol*. 2017;55:313-20.  
11  
12 380 29. Yamada H, Matsuda K, Akahane T, et al. A case of fulminant amoebic colitis with  
13 381 multiple large intestinal perforations. *Int Surg*. 2010;95:356-9.  
14  
15 382 30. Watanabe K, Aoki T, Nagata N, et al. Clinical significance of high anti-*Entamoeba*  
16 383 *histolytica* antibody titer in asymptomatic HIV-1-infected individuals. *J Infect Dis*.  
17 384 2014;209:1801-7.  
18  
19 385 31. Yoshikura H. A Strong Correlation between the Annual Incidence of Amebiasis and  
20 386 Homosexual Human Immunodeficiency Virus Type Infection in Men. *Jpn J Infect Dis*.  
21 387 2016;69:266-9.  
22  
23 388 32. Ohnishi K, Kato Y, Imamura A, et al. Present characteristics of symptomatic *Entamoeba*  
24 389 *histolytica* infection in the big cities of Japan. *Epidemiol Infect*. 2004;132:57-60.  
25  
26 390 33. Watanabe K, Gatanaga H, Escueta-de Cadiz A, et al. Amebiasis in HIV-1-infected  
27 391 Japanese men: clinical features and response to therapy. *PLoS Negl Trop Dis*.  
28 392 2011;5:e1318.  
29  
30 393 34. Yanagawa Y, Nagata N, Watanabe K, et al. Increases in *Entamoeba histolytica* Antibody-  
31 394 Positive Rates in Human Immunodeficiency Virus-Infected and Noninfected Patients in  
32 395 Japan: A 10-Year Hospital-Based Study of 3,514 Patients. *Am J Trop Med Hyg*.  
33 396 2016;95:604-9.  
34  
35 397 35. Watanabe K, Nagata N, Sekine K, et al. Asymptomatic Intestinal Amebiasis in Japanese  
36 398 HIV-1-Infected Individuals. *Am J Trop Med Hyg*. 2014;91:816-20.  
37  
38 399 36. Suzuki J, Kobayashi S, Iku I, et al. Seroprevalence of *Entamoeba histolytica* infection in  
39 400 female outpatients at a sexually transmitted disease sentinel clinic in Tokyo, Japan. *Jpn J*  
40 401 *Infect Dis*. 2008;61:175-8.  
41  
42 402

403

**404 Figure legends**

405 **Figure 1. Proportion of clients in each age group among men and women.** The average age  
406 among female clients was significantly lower than that in male clients ( $p < 0.001$ ). The  
407 proportion of clients aged 29 years or less among female clients was 53.4% whereas that in male  
408 clients was only 29.6%.

409 **Figure 2. Seropositivity for *Entamoeba histolytica* and other sexually transmitted infections**  
410 **(STIs) in Tokyo.** Serologic testing results (anti-*E. histolytica* antibody, HIV-1, RPR, and TPHA)  
411 were obtained for 2,083 clients of a voluntary counselling and testing centre in June and  
412 December of 2017. Results of urinary TMA for *Chlamydia trachomatis* and *Neisseria*  
413 *gonorrhoeae* were available for 1,437 clients who agreed to testing. All statistics were calculated  
414 using Fisher's exact test. (A) The seropositive rate for *E. histolytica* was compared with those of  
415 other STIs. (B) Comparison of seropositivity for *E. histolytica*, with and without other STIs.  
416 Abbreviations: CI, confidence interval; RPR, rapid plasma reagin; TPHA, *Treponema pallidum*  
417 hemagglutination; TMA, transcription-mediated amplification.

418 **Figure 3. Positive rate of sexually transmitted infections (STIs) by sex and age group.** (A)  
419 Positive rate of *Entamoeba histolytica* and other STIs were compared between male ( $n = 1474$ )  
420 and female ( $n = 609$ ) clients using Fisher's exact test. (B) Seropositive rates for *E. histolytica* and  
421 RPR, and TMA positivity for *Chlamydia trachomatis* were calculated for clients of different age  
422 groups (serum, urine samples): 29 years or younger (752, 503), 30–39 years (666, 453), 40–49  
423 years (443, 315), and 50s or older (222, 167). Correlation between age and positivity was  
424 calculated using the chi-square test for trend. Abbreviations: RPR, rapid plasma reagin test;  
425 TPHA, *Treponema pallidum* hemagglutination; TMA, transcription-mediated amplification.

20

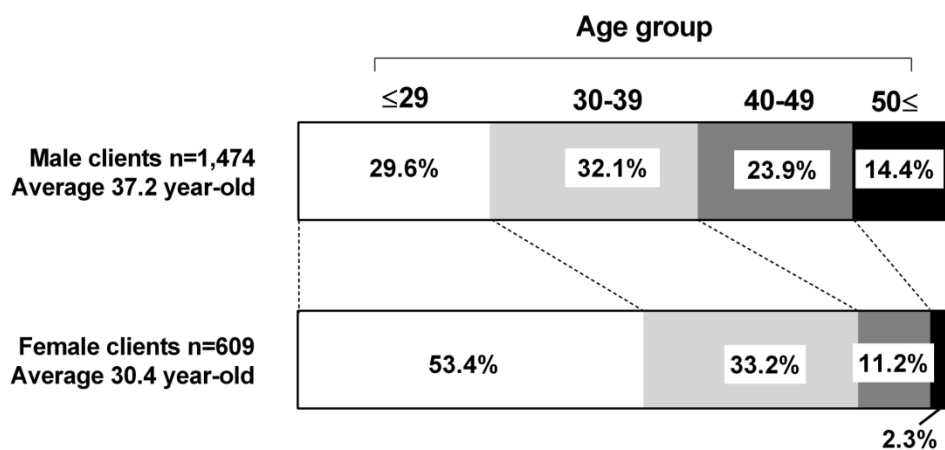

Figure 1. Proportion of clients in each age group among men and women. The average age among female clients was significantly lower than that in male clients ( $p < 0.001$ ). The proportion of clients aged 29 years or less among female clients was 53.4% whereas that in male clients was only 29.6%.

196x175mm (300 x 300 DPI)



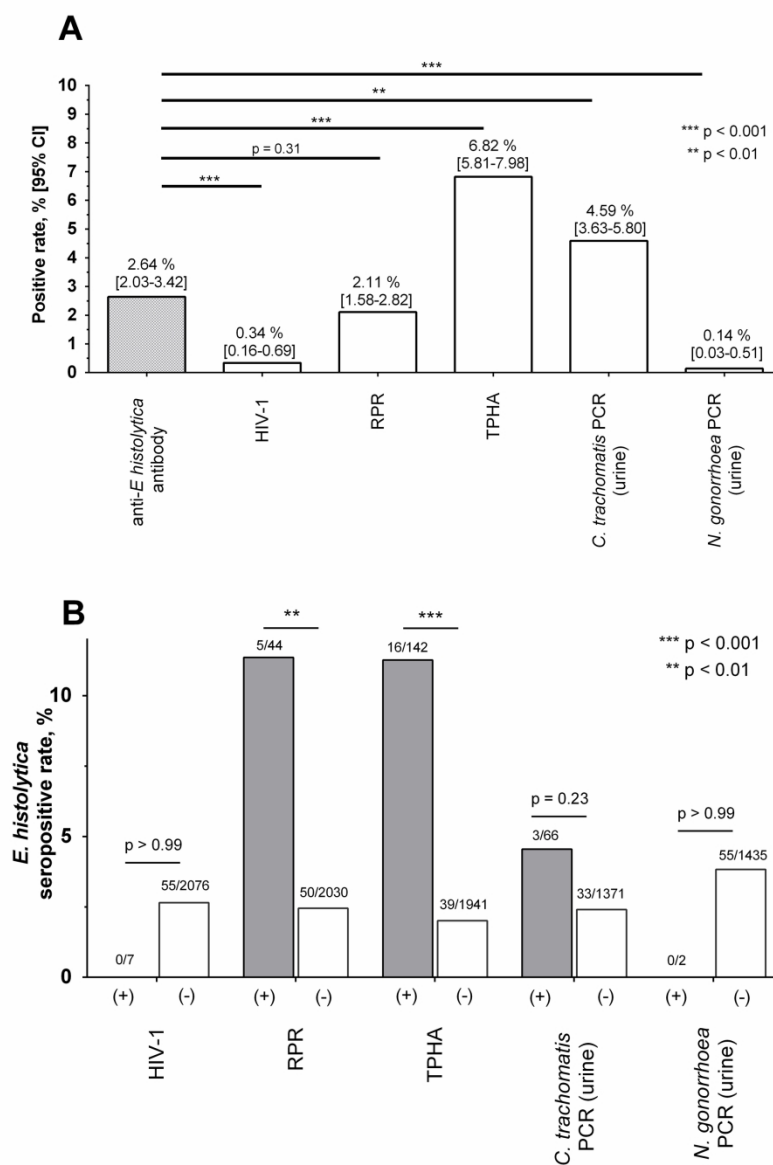

Figure 2. Seropositivity for *Entamoeba histolytica* and other sexually transmitted infections (STIs) in Tokyo. Serologic testing results (anti-*E. histolytica* antibody, HIV-1, RPR, and TPHA) were obtained for 2,083 clients of a voluntary counselling and testing centre in June and December of 2017. Results of urinary TMA for *Chlamydia trachomatis* and *Neisseria gonorrhoeae* were available for 1,437 clients who agreed to testing. All statistics were calculated using Fisher's exact test. (A) The seropositive rate for *E. histolytica* was compared with those of other STIs. (B) Comparison of seropositivity for *E. histolytica*, with and without other STIs. Abbreviations: CI, confidence interval; RPR, rapid plasma reagin; TPHA, *Treponema pallidum* hemagglutination; TMA, transcription-mediated amplification.

190x273mm (300 x 300 DPI)

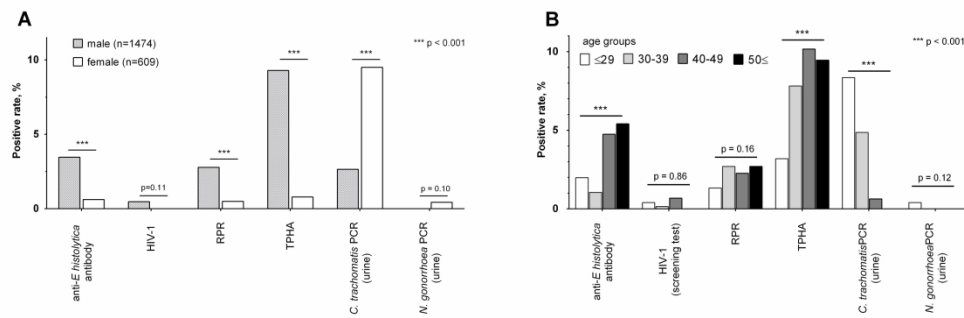

Figure 3. Positive rate of sexually transmitted infections (STIs) by sex and age group. (A) Positive rate of *Entamoeba histolytica* and other STIs were compared between male (n = 1474) and female (n = 609) clients using Fisher's exact test. (B) Seropositive rates for *E. histolytica* and RPR, and TMA positivity for *Chlamydia trachomatis* were calculated for clients of different age groups (serum, urine samples): 29 years or younger (752, 503), 30–39 years (666, 453), 40–49 years (443, 315), and 50s or older (222, 167). Correlation between age and positivity was calculated using the chi-square test for trend. Abbreviations: RPR, rapid plasma reagin test; TPHA, *treponema pallidum* hemagglutination; TMA, transcription-mediated amplification.

278x94mm (300 x 300 DPI)

1  
2  
3  
4  
5  
6  
7  
8  
9  
10  
11  
12  
13  
14  
15  
16  
17  
18  
19  
20  
21  
22  
23  
24  
25  
26  
27  
28  
29  
30  
31  
32  
33  
34  
35  
36  
37  
38  
39  
40  
41  
42  
43  
44  
45  
46  
47  
48  
49  
50  
51  
52  
53  
54  
55  
56  
57  
58  
59  
60STROBE Statement—Checklist of items that should be included in reports of *cross-sectional studies*

|                              | Item No | Recommendation                                                                                                                                                                                                                                                                                                                                                                                                                                                                                                                                       |
|------------------------------|---------|------------------------------------------------------------------------------------------------------------------------------------------------------------------------------------------------------------------------------------------------------------------------------------------------------------------------------------------------------------------------------------------------------------------------------------------------------------------------------------------------------------------------------------------------------|
| <b>Title and abstract</b>    | 1       | (a) Indicate the study's design with a commonly used term in the title or the abstract<br><b>[Indicated in the method section of the abstract on page 3]</b><br>(b) Provide in the abstract an informative and balanced summary of what was done and what was found <b>[Provided in method and results section of abstract on page 3]</b>                                                                                                                                                                                                            |
| <b>Introduction</b>          |         |                                                                                                                                                                                                                                                                                                                                                                                                                                                                                                                                                      |
| Background/rationale         | 2       | Explain the scientific background and rationale for the investigation being reported<br><b>[Explained in the introduction section of manuscript on page 4]</b>                                                                                                                                                                                                                                                                                                                                                                                       |
| Objectives                   | 3       | State specific objectives, including any prespecified hypotheses <b>[Stated at the end of the introduction part of manuscript on page 5]</b>                                                                                                                                                                                                                                                                                                                                                                                                         |
| <b>Methods</b>               |         |                                                                                                                                                                                                                                                                                                                                                                                                                                                                                                                                                      |
| Study design                 | 4       | Present key elements of study design early in the paper <b>[Presented under methods section of the manuscript on page 5]</b>                                                                                                                                                                                                                                                                                                                                                                                                                         |
| Setting                      | 5       | Describe the setting, locations, and relevant dates, including periods of recruitment, exposure, follow-up, and data collection <b>[Described under methods section of the manuscript on page 5]</b>                                                                                                                                                                                                                                                                                                                                                 |
| Participants                 | 6       | (a) Give the eligibility criteria, and the sources and methods of selection of participants <b>[Given under methods section on page 5-6]</b>                                                                                                                                                                                                                                                                                                                                                                                                         |
| Variables                    | 7       | Clearly define all outcomes, exposures, predictors, potential confounders, and effect modifiers. Give diagnostic criteria, if applicable <b>[Defined under methods section on pages 6, diagnostic details provided in serological testing under methods page 5-6]</b>                                                                                                                                                                                                                                                                                |
| Data sources/<br>measurement | 8*      | For each variable of interest, give sources of data and details of methods of assessment (measurement). Describe comparability of assessment methods if there is more than one group <b>[Described under participants and statistical analysis section of methods, pages 5-6]</b>                                                                                                                                                                                                                                                                    |
| Bias                         | 9       | Describe any efforts to address potential sources of bias <b>[Described under study population, samples, and ethics issues section of methods, page 5-6]</b>                                                                                                                                                                                                                                                                                                                                                                                         |
| Study size                   | 10      | Explain how the study size was arrived at <b>[Explained in sample size under methods, page 5]</b>                                                                                                                                                                                                                                                                                                                                                                                                                                                    |
| Quantitative variables       | 11      | Explain how quantitative variables were handled in the analyses. If applicable, describe which groupings were chosen and why <b>[Explained in methods, statistics page 6-7]</b>                                                                                                                                                                                                                                                                                                                                                                      |
| Statistical methods          | 12      | (a) Describe all statistical methods, including those used to control for confounding <b>[Described in statistics page 7]</b><br>(b) Describe any methods used to examine subgroups and interactions <b>[Described in statistics page 5-7]</b><br>(c) Explain how missing data were addressed <b>[Described in study population, samples, and ethics issues section of methods, page 6]</b><br>(d) If applicable, describe analytical methods taking account of sampling strategy <b>[N/A]</b><br>(e) Describe any sensitivity analyses <b>[N/A]</b> |
| <b>Results</b>               |         |                                                                                                                                                                                                                                                                                                                                                                                                                                                                                                                                                      |
| Participants                 | 13*     | (a) Report numbers of individuals at each stage of study—eg numbers potentially eligible, examined for eligibility, confirmed eligible, included in the study, completing follow-up, and analysed <b>[Reported in results section page 7]</b><br>(b) Give reasons for non-participation at each stage <b>[N/A]</b><br>(c) Consider use of a flow diagram <b>[N/A]</b>                                                                                                                                                                                |

|    |                          |     |                                                                                                                                                                                                                                                                                            |
|----|--------------------------|-----|--------------------------------------------------------------------------------------------------------------------------------------------------------------------------------------------------------------------------------------------------------------------------------------------|
| 1  |                          |     |                                                                                                                                                                                                                                                                                            |
| 2  | Descriptive data         | 14* | (a) Give characteristics of study participants (eg demographic, clinical, social) and information on exposures and potential confounders [ <b>Given in results section page 7-9</b> ]                                                                                                      |
| 3  |                          |     | (b) Indicate number of participants with missing data for each variable of interest [ <b>N/A</b> ]                                                                                                                                                                                         |
| 4  |                          |     |                                                                                                                                                                                                                                                                                            |
| 5  |                          |     |                                                                                                                                                                                                                                                                                            |
| 6  | Outcome data             | 15* | Report numbers of outcome events or summary measures [ <b>Reported in results section pages 7-11</b> ]                                                                                                                                                                                     |
| 7  |                          |     |                                                                                                                                                                                                                                                                                            |
| 8  | Main results             | 16  | (a) Give unadjusted estimates and, if applicable, confounder-adjusted estimates and their precision (eg, 95% confidence interval). Make clear which confounders were adjusted for and why they were included [ <b>Described under method (page 5-6) and results and tables pages 7-9</b> ] |
| 9  |                          |     | (b) Report category boundaries when continuous variables were categorized [ <b>Reported under results, figures, and tables page 8-10</b> ]                                                                                                                                                 |
| 10 |                          |     | (c) If relevant, consider translating estimates of relative risk into absolute risk for a meaningful time period [ <b>N/A</b> ]                                                                                                                                                            |
| 11 |                          |     |                                                                                                                                                                                                                                                                                            |
| 12 |                          |     |                                                                                                                                                                                                                                                                                            |
| 13 |                          |     |                                                                                                                                                                                                                                                                                            |
| 14 |                          |     |                                                                                                                                                                                                                                                                                            |
| 15 |                          |     |                                                                                                                                                                                                                                                                                            |
| 16 |                          |     |                                                                                                                                                                                                                                                                                            |
| 17 |                          |     |                                                                                                                                                                                                                                                                                            |
| 18 | Other analyses           | 17  | Report other analyses done—eg analyses of subgroups and interactions, and sensitivity analyses [ <b>N/A</b> ]                                                                                                                                                                              |
| 19 |                          |     |                                                                                                                                                                                                                                                                                            |
| 20 |                          |     |                                                                                                                                                                                                                                                                                            |
| 21 | <b>Discussion</b>        |     |                                                                                                                                                                                                                                                                                            |
| 22 | Key results              | 18  | Summarise key results with reference to study objectives [ <b>Page 11</b> ]                                                                                                                                                                                                                |
| 23 | Limitations              | 19  | Discuss limitations of the study, taking into account sources of potential bias or imprecision. Discuss both direction and magnitude of any potential bias [ <b>Discussed on page 12-13</b> ]                                                                                              |
| 24 |                          |     |                                                                                                                                                                                                                                                                                            |
| 25 |                          |     |                                                                                                                                                                                                                                                                                            |
| 26 |                          |     |                                                                                                                                                                                                                                                                                            |
| 27 |                          |     |                                                                                                                                                                                                                                                                                            |
| 28 | Interpretation           | 20  | Give a cautious overall interpretation of results considering objectives, limitations, multiplicity of analyses, results from similar studies, and other relevant evidence [ <b>Given on page 12-13</b> ]                                                                                  |
| 29 |                          |     |                                                                                                                                                                                                                                                                                            |
| 30 |                          |     |                                                                                                                                                                                                                                                                                            |
| 31 |                          |     |                                                                                                                                                                                                                                                                                            |
| 32 | Generalisability         | 21  | Discuss the generalisability (external validity) of the study results [ <b>Discussed on page 12-13</b> ]                                                                                                                                                                                   |
| 33 |                          |     |                                                                                                                                                                                                                                                                                            |
| 34 | <b>Other information</b> |     |                                                                                                                                                                                                                                                                                            |
| 35 | Funding                  | 22  | Give the source of funding and the role of the funders for the present study and, if applicable, for the original study on which the present article is based [ <b>Given in acknowledgement section page 15</b> ]                                                                          |
| 36 |                          |     |                                                                                                                                                                                                                                                                                            |
| 37 |                          |     |                                                                                                                                                                                                                                                                                            |
| 38 |                          |     |                                                                                                                                                                                                                                                                                            |
| 39 |                          |     |                                                                                                                                                                                                                                                                                            |

\*Give information separately for exposed and unexposed groups.

**Note:** An Explanation and Elaboration article discusses each checklist item and gives methodological background and published examples of transparent reporting. The STROBE checklist is best used in conjunction with this article (freely available on the Web sites of PLoS Medicine at <http://www.plosmedicine.org/>, Annals of Internal Medicine at <http://www.annals.org/>, and Epidemiology at <http://www.epidem.com/>). Information on the STROBE Initiative is available at [www.strobe-statement.org](http://www.strobe-statement.org).

# BMJ Open

## Seroprevalence of *Entamoeba histolytica* at a voluntary counselling and testing centre in Tokyo: a cross-sectional study

|                                 |                                                                                                                                                                                                                                                                                                                                                                                                                                                                                                                                                                                                                                                                                                                                                                                                                                                                                                                                                                                                                                                                                                                                                     |
|---------------------------------|-----------------------------------------------------------------------------------------------------------------------------------------------------------------------------------------------------------------------------------------------------------------------------------------------------------------------------------------------------------------------------------------------------------------------------------------------------------------------------------------------------------------------------------------------------------------------------------------------------------------------------------------------------------------------------------------------------------------------------------------------------------------------------------------------------------------------------------------------------------------------------------------------------------------------------------------------------------------------------------------------------------------------------------------------------------------------------------------------------------------------------------------------------|
| Journal:                        | <i>BMJ Open</i>                                                                                                                                                                                                                                                                                                                                                                                                                                                                                                                                                                                                                                                                                                                                                                                                                                                                                                                                                                                                                                                                                                                                     |
| Manuscript ID                   | bmjopen-2019-031605.R1                                                                                                                                                                                                                                                                                                                                                                                                                                                                                                                                                                                                                                                                                                                                                                                                                                                                                                                                                                                                                                                                                                                              |
| Article Type:                   | Research                                                                                                                                                                                                                                                                                                                                                                                                                                                                                                                                                                                                                                                                                                                                                                                                                                                                                                                                                                                                                                                                                                                                            |
| Date Submitted by the Author:   | 15-Dec-2019                                                                                                                                                                                                                                                                                                                                                                                                                                                                                                                                                                                                                                                                                                                                                                                                                                                                                                                                                                                                                                                                                                                                         |
| Complete List of Authors:       | YANAGAWA, Yasuaki; National Center for Global Health and Medicine Hospital, AIDS Clinical Center; National Institute of Infectious Diseases, Department of Parasitology<br>Nagashima, Mami; Tokyo Metropolitan Institute for Public Health, Department of Microbiology<br>Gatanaga, Hiroyuki; National Center for Global Health and Medicine Hospital, AIDS Clinical Center; Kumamoto University, Center for AIDS Research<br>Kikuchi, Yoshimi; National Center for Global Health and Medicine Hospital, AIDS Clinical Center<br>Oka, Shinichi; National Center for Global Health and Medicine Hospital, AIDS Clinical Center; Kumamoto University, Center for AIDS Research<br>Yokoyama, Keiko; Tokyo Metropolitan Institute for Public Health, Department of Microbiology<br>Shinkai, Takayuki; Tokyo Metropolitan Institute for Public Health, Department of Microbiology<br>Sadamasu, Kenji; Tokyo Metropolitan Institute for Public Health, Department of Microbiology<br>Watanabe, Koji; National Center for Global Health and Medicine Hospital, AIDS Clinical Center; National Institute of Infectious Diseases, Department of Parasitology |
| <b>Primary Subject Heading</b>: | Epidemiology                                                                                                                                                                                                                                                                                                                                                                                                                                                                                                                                                                                                                                                                                                                                                                                                                                                                                                                                                                                                                                                                                                                                        |
| Secondary Subject Heading:      | Infectious diseases, Public health                                                                                                                                                                                                                                                                                                                                                                                                                                                                                                                                                                                                                                                                                                                                                                                                                                                                                                                                                                                                                                                                                                                  |
| Keywords:                       | PARASITOLOGY, Epidemiology < INFECTIOUS DISEASES, Tropical medicine < INFECTIOUS DISEASES, Diagnostic microbiology < INFECTIOUS DISEASES, Public health < INFECTIOUS DISEASES, SEXUAL MEDICINE                                                                                                                                                                                                                                                                                                                                                                                                                                                                                                                                                                                                                                                                                                                                                                                                                                                                                                                                                      |
|                                 |                                                                                                                                                                                                                                                                                                                                                                                                                                                                                                                                                                                                                                                                                                                                                                                                                                                                                                                                                                                                                                                                                                                                                     |

SCHOLARONE™  
Manuscripts



I, the Submitting Author has the right to grant and does grant on behalf of all authors of the Work (as defined in the below author licence), an exclusive licence and/or a non-exclusive licence for contributions from authors who are: i) UK Crown employees; ii) where BMJ has agreed a CC-BY licence shall apply, and/or iii) in accordance with the terms applicable for US Federal Government officers or employees acting as part of their official duties; on a worldwide, perpetual, irrevocable, royalty-free basis to BMJ Publishing Group Ltd ("BMJ") its licensees and where the relevant Journal is co-owned by BMJ to the co-owners of the Journal, to publish the Work in this journal and any other BMJ products and to exploit all rights, as set out in our [licence](#).

The Submitting Author accepts and understands that any supply made under these terms is made by BMJ to the Submitting Author unless you are acting as an employee on behalf of your employer or a postgraduate student of an affiliated institution which is paying any applicable article publishing charge ("APC") for Open Access articles. Where the Submitting Author wishes to make the Work available on an Open Access basis (and intends to pay the relevant APC), the terms of reuse of such Open Access shall be governed by a Creative Commons licence – details of these licences and which [Creative Commons](#) licence will apply to this Work are set out in our licence referred to above.

Other than as permitted in any relevant BMJ Author's Self Archiving Policies, I confirm this Work has not been accepted for publication elsewhere, is not being considered for publication elsewhere and does not duplicate material already published. I confirm all authors consent to publication of this Work and authorise the granting of this licence.

1  
2  
3 1 **Research article**  
4

5 2 **Title:**

6 3 **Seroprevalence of *Entamoeba histolytica* at a voluntary counselling and testing centre in**  
7  
8 4 **Tokyo: a cross-sectional study**  
9  
10  
11

12 5  
13  
14 6 Yasuaki Yanagawa <sup>1,2#</sup>, Mami Nagashima <sup>3#</sup>, Hiroyuki Gatanaga <sup>1,4</sup>, Yoshimi Kikuchi <sup>1</sup>, Shinichi  
15 7 Oka <sup>1,4</sup>, Keiko Yokoyama <sup>3</sup>, Takayuki Shinkai <sup>3</sup>, Kenji Sadamasu <sup>3</sup>, and Koji Watanabe <sup>1,2\*</sup>  
16  
17  
18

19 8  
20  
21 9 1. National Center for Global Health and Medicine, Tokyo, Japan

22 10 2. National Institute of Infectious Diseases, Tokyo, Japan

23 11 3. Tokyo Metropolitan Institute of Public Health, Shijuku, Tokyo, Japan

24 12 4. Kumamoto University, Kumamoto, Japan

25 13 # These authors contributed equally to this article.  
26  
27  
28

29 14  
30  
31 15 **\* Corresponding author:**

32 16 Koji Watanabe, AIDS Clinical Center, National Center for Global Health and Medicine. 1-21-1,  
33 17 Toyama, Shinjuku-ku, Tokyo 162-8655, Japan  
34  
35

36 18 Tel: +81-3-3202-7181, Fax: +81-3-5273-6483, E-mail: kwatanab@acc.ncgm.go.jp  
37  
38  
39

40 19  
41  
42 20 **# Institutional addresses of authors.** Yasuaki Yanagawa, AIDS Clinical Center, National

43 21 Center of Global Health and Medicine, Tokyo, Japan. Department of Parasitology, National

44 22 Institutes of Infectious Diseases, Tokyo, Japan. Mami Nagashima, Department of Microbiology,

45 23 Tokyo Metropolitan Institute of Public Health, Tokyo, Japan. Hiroyuki Gatanaga, AIDS Clinical  
46  
47  
48  
49  
50  
51  
52  
53  
54  
55  
56  
57  
58  
59  
60

1  
2  
3 24 Center, National Center of Global Health and Medicine, Tokyo, Japan. Center for AIDS  
4  
5 25 Research, Kumamoto University, Kumamoto, Japan. Yoshimi Kikuchi, AIDS Clinical Center,  
6  
7 26 National Center of Global Health and Medicine, Tokyo, Japan. Shinichi Oka, AIDS Clinical  
8  
9  
10 27 Center, National Center of Global Health and Medicine, Tokyo, Japan. Center for AIDS  
11  
12 28 Research, Kumamoto University, Kumamoto, Japan. Keiko Yokoyama, Department of  
13  
14 29 Microbiology, Tokyo Metropolitan Institute of Public Health, Tokyo, Japan. Takayuki Shinkai,  
15  
16 30 Department of Microbiology, Tokyo Metropolitan Institute of Public Health, Tokyo, Japan.  
17  
18 31 Kenji Sadamasu, Department of Microbiology, Tokyo Metropolitan Institute of Public Health,  
19  
20 32 Tokyo, Japan. Koji Watanabe, AIDS Clinical Center, National Center of Global Health and  
21  
22 33 Medicine, Tokyo, Japan. Department of Parasitology, National Institutes of Infectious Diseases,  
23  
24 34 Tokyo, Japan.  
25  
26  
27  
28  
29  
30

31 **Word counts.** abstract 266 words, manuscript 2,614 words  
32  
33  
34

35  
36 38 **Keywords:** Parasitology, Epidemiology, Tropical medicine, Diagnostic microbiology, Public  
37  
38 39 health, Sexual medicine.  
39  
40  
41

42 41 **Footnotes:** Preliminary results from this study were presented at ASM Microbe 2018, convened  
43  
44 42 June 7-11, 2018, in Atlanta, GA, USA.  
45  
46  
47  
48  
49  
50  
51  
52  
53  
54  
55  
56  
57  
58  
59  
60



1  
2  
3 **43 Abstract (266 words)**  
4

5 **44 Background** Amebiasis, which is caused by *Entamoeba histolytica*, is a re-emerging public  
6  
7  
8 **45** health issue owing to sexually transmitted infection (STI) in Japan. However, epidemiological  
9  
10 **46** data are quite limited.

11  
12 **47 Methods** To reveal the relative prevalence of sexually transmitted *E. histolytica* infection to  
13  
14  
15 **48** other STIs, we conducted a cross-sectional study at a voluntary counselling and testing (VCT)  
16  
17 **49** centre in Tokyo. Seroprevalence of *E. histolytica* was assessed according to positivity with an  
18  
19 **50** enzyme-linked immunosorbent assay for *E. histolytica*-specific IgG in serum samples collected  
20  
21 **51** from anonymous VCT clients.

22  
23  
24 **52 Results** Among 2,083 samples, seropositive rate for *E. histolytica* was 2.64%, which was higher  
25  
26 **53** than that for HIV-1 (0.34%,  $p < 0.001$ ) and comparable to that for syphilis (rapid plasma reagin  
27  
28 **54** (RPR) 2.11%,  $p = 0.31$ ). Positivity for *Chlamydia trachomatis* in urine by transcription-mediated  
29  
30 **55** amplification (TMA) was 4.59%. Seropositivity for *E. histolytica* was high among RPR- or  
31  
32 **56** *Treponema pallidum* hemagglutination (TPHA)-positive individuals and it was not different  
33  
34  
35 **57** between clients with and without other STIs. Both seropositivity of *E. histolytica* and RPR were  
36  
37 **58** high among male clients. The seropositive rate for anti-*E. histolytica* antibody was positively  
38  
39 **59** correlated with age. TMA positivity for urine *C. trachomatis* was high among female clients and  
40  
41 **60** negatively correlated with age. Regression analysis identified that male sex, older age, and  
42  
43  
44 **61** TPHA-positive results are independent risk factors of *E. histolytica* seropositivity.

45  
46  
47 **62 Conclusions** Seroprevalence of *E. histolytica* was 7.9 times higher than that of HIV-1 at a VCT  
48  
49 **63** centre in Tokyo, with a tendency to be higher among people at risk for syphilis infection. There  
50  
51 **64** is a need for education and specific interventions against this parasite, as a potentially re-  
52  
53  
54 **65** emerging pathogen.

1  
2  
3 **66 Strengths and limitations of this study**  
4

- 5 67 ➤ This study is the first to examine the seroprevalence of *E. histolytica* at a voluntary  
6  
7 68 counselling and testing (VCT) centre in Tokyo, where active surveillance for *E. histolytica*  
8  
9 69 infection is lacking, including among asymptotically infected individuals.  
10  
11 70 ➤ This was a cross-sectional study of anonymous clients at a VCT centre. Thus, comparisons  
12  
13 71 are possible of the seroprevalence of *E. histolytica* with other STIs.  
14  
15 72 ➤ We could not assess risk behaviour or sexual behaviour and cannot exclude the possibility of  
16  
17 73 selection bias among VCT centre clients.  
18  
19  
20  
21  
22  
23  
24  
25  
26  
27  
28  
29  
30  
31  
32  
33  
34  
35  
36  
37  
38  
39  
40  
41  
42  
43  
44  
45  
46  
47  
48  
49  
50  
51  
52  
53  
54  
55  
56  
57  
58  
59  
60

1  
2  
3 75 **Text (2,614 words)**  
4

5  
6 76 **INTRODUCTION**  
7

8 77 Amebiasis is an enteric protozoa infection caused by *Entamoeba histolytica*. Up to 80% of  
9  
10 78 *E. histolytica* infections are asymptomatic but persistent; the remainder result in the development  
11  
12 79 of invasive diseases, such as colitis and liver abscess [1]. Asymptomatically infected individuals  
13  
14 80 represent a risk to the community because they are a source of new infections. Transmission  
15  
16 81 occurs via the oral–faecal route. It has long been believed that amebiasis is only endemic in  
17  
18 82 developing countries where food and water are frequently contaminated with human faeces, or  
19  
20 83 that it occurs among travellers to or immigrants from these countries [1, 2]. However, in the  
21  
22 84 previous two decades, it has been reported that cases of amebiasis have been rapidly increasing  
23  
24 85 and have become a re-emerging infectious disease not only in developed countries of East Asia  
25  
26 86 but also in European developed countries [3-12]. Human-to-human transmission occurs via  
27  
28 87 direct sexual contact, such as oral–anal sexual contact and contact among men who have sex  
29  
30 88 with men in these countries [13, 14]. Under such circumstances, it is essential to identify  
31  
32 89 individuals who are asymptomatic but chronically infected with *E. histolytica* and who thus  
33  
34 90 represent sources of new infection, for the epidemiologic control of sexually transmitted *E.*  
35  
36 91 *histolytica* infection. However, little epidemiological data is currently available in Japan, other  
37  
38 92 than that from National Epidemiological Surveillance of Infectious Diseases (NESID), which  
39  
40 93 only reports clinically diagnosed “symptomatic” cases. Moreover, it is critical to understand the  
41  
42 94 epidemiology of sexually transmitted *E. histolytica* infection before the upcoming Tokyo  
43  
44 95 Olympics in 2020, which could serve as a source of the rapid spread of such neglected  
45  
46 96 communicable diseases.  
47  
48  
49  
50  
51  
52  
53  
54  
55  
56  
57  
58  
59  
60

1  
2  
3 97 The aim of the present study was to investigate the seroprevalence of *E. histolytica* at a  
4  
5 98 voluntary counselling and testing (VCT) centre in Tokyo, in comparison with the prevalence of  
6  
7  
8 99 other sexually transmitted infections (STIs). In addition, we discuss future strategies for the  
9  
10 100 epidemiologic control of sexually transmitted *E. histolytica* infection.

## 11 12 101 **METHODS**

### 13 14 15 102 **Setting**

16  
17 103 Tokyo, the capital city of Japan, is located on the Pacific on the eastern coast of Honshu,  
18  
19 104 the largest of the four main islands comprising Japan. According to the national surveillance  
20  
21  
22 105 system, the annual number of HIV tests performed and the incidence rates of HIV infection are  
23  
24 106 higher in Tokyo than those of other prefectures [15]. The Tokyo Metropolitan Minami Shinjuku  
25  
26 107 Testing – Counselling Centre is the largest HIV testing centre in Tokyo, and it is very close to a  
27  
28 108 town in Shinjuku with a large population of men who have sex with men (MSM) [16]. Because  
29  
30 109 there are more MSM who visit this centre to undergo testing for HIV and other STIs, the  
31  
32  
33 110 incidence rate of HIV infection at this centre is higher than that of other public health centres in  
34  
35 111 Tokyo [17].

### 36 37 38 112 **Study population, samples, and ethics issues**

39  
40 113 The design of this study was a cross-sectional study. The total 2,083 serum samples used in  
41  
42 114 this study were collected at the Tokyo Metropolitan Minami Shinjuku Testing – Counselling  
43  
44 115 Centre where more than 10,000 anonymous clients seek HIV-1 screening tests each year.  
45  
46 116 Collected samples are transferred to the Tokyo Metropolitan Institute of Public Health for  
47  
48  
49 117 laboratory testing, then stored at 4°C. Fourth generation HIV-1 screening is performed routinely  
50  
51 118 throughout the year. However, in 2 months of the year (e.g., June and December in the case of  
52  
53  
54  
55  
56  
57  
58  
59  
60

1  
2  
3 119 2017), the Tokyo Metropolitan Government intensifies STI screening, and rapid plasma reagin  
4  
5 120 (RPR) and *Treponema pallidum* hemagglutination (TPHA) tests for syphilis screening are  
6  
7 121 additionally performed for all clients. In addition, urinary sampling and transcription-mediated  
8  
9 122 amplification (TMA) assay testing for *Chlamydia trachomatis* and *Neisseria gonorrhoeae* are  
10  
11 123 performed for clients who are willing to undergo these tests. Therefore, we assessed the  
12  
13 124 seroprevalence of anti-*E. histolytica* antibody using stored serum samples collected in June and  
14  
15 125 December of 2017 and compared this with the positivity for other STIs in the present study. In  
16  
17 126 the present study, there was no selection bias or missing data.

18  
19 127 This study was approved by the ethics committee of the National Center for Global Health  
20  
21 128 and Medicine (NCGM-2302) and Tokyo Metropolitan Institute of Public Health (29-875). All  
22  
23 129 protocols for this study were conducted in accordance with the Declaration of Helsinki.

### 24 130 **Laboratory testing**

25  
26 131 The presence of anti-*E. histolytica* antibody was detected using a commercially available  
27  
28 132 ELISA kit (*Entamoeba histolytica* IgG-ELISA; GenWay Biotech, Inc., San Diego, CA. USA).  
29  
30 133 All procedures were performed according to the manufacturer's instructions. In brief, diluted  
31  
32 134 serum samples (100X dilution in IgG sample diluent) as well as 5 control samples, consisting of  
33  
34 135 1 substrate blank, 1 negative control, 2 cut-off controls, and 1 positive control, were applied to  
35  
36 136 96-well plates pre-treated with *E. histolytica* antigen and incubated at 37°C for 1 hour. After  
37  
38 137 washing the plates using washing solution, 100 µL of *E. histolytica* Protein A conjugate was  
39  
40 138 added to all wells except the substrate blank and incubated for 30 minutes in the dark. After a  
41  
42 139 second wash, TMB (3,3',5,5'-Tetramethylbenzidine) substrate solution was added to all wells.  
43  
44  
45  
46  
47  
48  
49  
50  
51  
52  
53  
54  
55  
56  
57  
58  
59  
60

1  
2  
3 140 After a 15-minute incubation, 100 µL of stop solution was applied to the plates, and absorbance  
4  
5 141 of the specimen was then read at 450/620 nm using a spectrometer.  
6  
7

## 8 142 **Statistical analysis**

9  
10 143 Of the total samples tested in each STI screening test, the proportion of seropositive blood  
11  
12 144 and urine samples are presented with 95% confidence interval (CIs) calculated using the Wilson–  
13  
14 145 Brown method. The seroprevalence of *E. histolytica* was compared with that of other sexually  
15  
16 146 transmitted infections using Fisher’s exact test. To determine the trend of seropositivity among  
17  
18 147 age groups, we used the chi-square test for trend. Statistical significance was defined as a two-  
19  
20 148 sided p value < 0.05. All statistical analyses were conducted using GraphPad Prism (GraphPad  
21  
22 149 Software, La Jolla, CA, USA). Logistic regression analysis for identification of factors  
23  
24 150 influencing *E. histolytica* seropositivity was performed using Stata (StataCorp LLC., College  
25  
26 151 Station, TX, USA).  
27  
28  
29

## 30 152 **Patient and public involvement**

31  
32 153 Patients and public were not involved in the design and conduct of this research.  
33  
34

## 35 154 **RESULTS**

### 36 155 **Study population and seroprevalence of *E. histolytica* at a voluntary counselling and testing** 37 38 156 **centre in Tokyo**

39  
40 157 In total, 2,083 samples were analysed. The average age of clients was 35.2 (95% CI: 34.8–  
41  
42 158 35.7) years, and 70.8% (1474/2083) were male (Fig 1). The overall seropositive rate for *E.*  
43  
44 159 *histolytica* was 2.64%; this was significantly higher than that for HIV-1 (0.34%) and the  
45  
46 160 comparable level as that for syphilis by RPR (2.11%) (Fig 2A). The positive rate of urinary TMA  
47  
48 161 for *C. trachomatis* (4.59%) was higher than that for *E. histolytica*; however, urinary TMA testing  
49  
50  
51  
52  
53  
54  
55  
56  
57  
58  
59  
60

1  
2  
3 162 for *C. trachomatis* and *N. gonorrhoeae* was only carried out in 69.0% (1,437/2,083) of clients,  
4  
5 163 i.e., those who were willing to undergo TMA testing. These results suggest that *E. histolytica* is a  
6  
7 164 more common STI than HIV-1 in Tokyo and is at a level comparable to that of syphilis infection.  
8  
9  
10 165 Interestingly, all individuals who were seropositive for *E. histolytica* were seronegative for HIV-  
11  
12 166 1 (Fig 2B). Furthermore, the seropositive rate for *E. histolytica* was significantly higher among  
13  
14 167 people who were seropositive for syphilis infection (by both RPR and TPHA) than among those  
15  
16 168 who were seronegative for syphilis; no significant differences in *E. histolytica* seropositivity  
17  
18 169 were seen according to TMA positivity for *C. trachomatis*. These results indicate that *E.*  
19  
20 170 *histolytica* infection is spreading among people at risk for syphilis infection.  
21  
22  
23

#### 24 171 **Differences in seropositivity by sex and age group**

25  
26 172 Next, we compared positivity for STIs between male and female clients. The seropositive  
27  
28 173 rate for *E. histolytica* was significantly higher in male (3.46%) than in female (0.66%) clients, as  
29  
30 174 seen for syphilis infection (RPR: 2.78% vs. 0.49% and TPHA: 9.29% vs. 0.82%) (Fig 3A). The  
31  
32 175 proportion of urinary TMA results positive for *C. trachomatis* was significantly higher in female  
33  
34 176 (8.77%) than male (2.65%) clients. However, it is difficult to simply compare the TMA  
35  
36 177 positivity by sex because persistent, asymptomatic *C. trachomatis* infection of the urinary tract  
37  
38 178 occurs more frequently in females [18-21]. Moreover, the age of female clients was significantly  
39  
40 179 lower than that of males, and the proportion of clients aged 29 years or less in females was  
41  
42 180 53.4% whereas that in males was only 29.6% (Fig 1). These results indicate that both male and  
43  
44 181 female clients in this study are at risk for STIs; however, the predominant pathogens might differ  
45  
46 182 between relatively older males (*E. histolytica* and *T. pallidum*) and relatively younger females  
47  
48 183 (*C. trachomatis*).  
49  
50  
51  
52  
53  
54  
55  
56  
57  
58  
59  
60

1  
2  
3 184 To determine the trend of *E. histolytica* seropositivity by age, we compared seropositivity  
4  
5 185 for *E. histolytica* in different age groups. Interestingly, the seropositive rates for anti-*E.*  
6  
7 186 *histolytica* antibody and RPR was highest among clients aged 50 years or older (5.41% and  
8  
9 187 2.70%, respectively). Moreover, a positive correlation was observed between age and  
10  
11 188 seropositivity for *E. histolytica* (Fig 3B). Positive urinary TMA for *C. trachomatis* was highest  
12  
13 189 among clients aged 29 years or younger (8.35%) and showed a negative correlation with age.  
14  
15 190 These results are consistent with national surveillance data, in which diagnosed cases of  
16  
17 191 *Chlamydia* infection have a peak in the 20s [22], whereas the median age of reported cases of  
18  
19 192 amebiasis is relatively high (50 years in men and 40 years in women) [5, 20]. Considering these  
20  
21 193 findings, *E. histolytica* infection might be more prevalent among relatively older age groups (40  
22  
23 194 years or more) whereas *Chlamydia* infection is more prevalent in relatively younger populations.

### 195 **Risk of seropositivity for *E. histolytica***

196 Finally, to identify the risk factors of seropositivity for *E. histolytica*, we compared  
197 positivity for STIs between clients who were positive and negative for *E. histolytica* (Table 1).  
198 Although there were no statistical differences in the positive rates for HIV-1, *C. trachomatis*, or  
199 *N. gonorrhoeae*, the positive rates for any STIs were higher in clients who were positive for *E.*  
200 *histolytica* than in *E. histolytica*-negative clients (30.56% vs. 10.49%,  $p = 0.0001$ ). Thus, we  
201 performed logistic regression analysis using data of client characteristics and the results of STI  
202 screening tests. Univariate and multivariate regression analyses revealed that male sex, a history  
203 of syphilis infection (by TPHA), and older age were independent risk factors of seropositivity for  
204 *E. histolytica* (Table 2). In particular, age 40 years or older was a high-risk factor of  
205 seropositivity for *E. histolytica* (odds ratio 3.31 in people aged less than 40 years,  $p$  value <  
206 0.001 by univariate analysis; data not shown). In addition, univariate analysis showed that



1  
2  
3 207 positive RPR was a high-risk factor for *E. histolytica* seropositivity; however, this was  
4  
5 208 diminished in multivariate analysis owing to the strong association with TPHA positivity.  
6  
7 209 Univariate analysis using preliminary urinary TMA data of 1,437 participants showed that  
8  
9  
10 210 positivity for *C. trachomatis* in the urine had no impact on *E. histolytica* seropositivity (Table 2).  
11  
12 211 We could not include HIV-1 serology and TMA positivity for *N. gonorrhoeae* in urine in the  
13  
14 212 logistic regression analyses because no clients who were HIV-1 seropositive or positive for *N.*  
15  
16 213 *gonorrhoeae* by TMA were also seropositive for *E. histolytica*.  
17  
18  
19  
20  
21  
22  
23  
24  
25  
26  
27  
28  
29  
30  
31  
32  
33  
34  
35  
36  
37  
38  
39  
40  
41  
42  
43  
44  
45  
46  
47  
48  
49  
50  
51  
52  
53  
54  
55  
56  
57  
58  
59  
60

214 **Table 1. Comparison of positive results for other STIs between *E. histolytica* seropositive**  
 215 **and seronegative clients.**

|                                   | <i>E. histolytica</i> seropositive | <i>E. histolytica</i> seronegative | p value  |
|-----------------------------------|------------------------------------|------------------------------------|----------|
| Male, % (n)                       | 92.73% (51/55)                     | 70.17% (1423/2028)                 | 0.0001   |
| Age, mean (SD)                    | 41.6 (12.56)                       | 35.1 (10.4)                        | < 0.0001 |
| Positive rate, % (n)              |                                    |                                    |          |
| HIV-1                             | 0% (0/55)                          | 0.35% (7/2028)                     | > 0.999  |
| RPR                               | 9.09% (5/55)                       | 1.92% (39/2028)                    | 0.005    |
| TPHA                              | 29.09% (16/55)                     | 6.21% (126/2028)                   | < 0.0001 |
| Urine <i>C. trachomatis</i> (TMA) | 8.33% (3/36)                       | 4.50% (63/1401)                    | 0.227    |
| Urine <i>N. gonorrhoeae</i> (TMA) | 0% (0/36)                          | 0.14% (2/1401)                     | > 0.999  |
| Any of the above STIs             | 30.56% (11/36)                     | 10.49% (147/1401)                  | 0.0001   |

216 The positive rate of any of the other STIs was calculated only in clients whose blood and urine  
 217 were tested.

218 Abbreviations: STIs, sexually transmitted infections; RPR, rapid plasma reagin; TPHA,  
 219 *Treponema pallidum* hemagglutination; TMA, transcription-mediated amplification.

220

221 **Table 2. Impact of individual characteristics of seropositivity for *Entamoeba histolytica*,**  
 222 **Tokyo.**

223 \* Data of urinary TMA testing available only for 69.0% (1,437 of 2,083) of total clients.

|  |                                                | Univariate analysis  |         | Multivariate analysis*** |         |
|--|------------------------------------------------|----------------------|---------|--------------------------|---------|
|  |                                                | OR                   | p value | OR                       | p value |
|  |                                                | (95% CI)             |         | (95% CI)                 |         |
|  | Sex (Male)                                     | 5.42<br>(1.95–15.06) | < 0.001 | 3.17<br>(1.10–9.07)      | 0.032   |
|  | Older age<br>(by 10-year age groups)           | 1.66<br>(1.33–2.08)  | < 0.001 | 1.49<br>(1.17–1.90)      | 0.001   |
|  | HIV-1 positive                                 | ND**                 |         |                          |         |
|  | Syphilis infection                             |                      |         |                          |         |
|  | RPR positive                                   | 5.1<br>(1.93–13.49)  | 0.006   | 1.26<br>(0.41–3.89)      | 0.693   |
|  | TPHA positive                                  | 6.19<br>(3.37–11.39) | < 0.001 | 4.30<br>(2.11–8.76)      | < 0.001 |
|  | Urine <i>C. trachomatis</i> (TMA)<br>positive* | 1.93<br>(0.58–6.47)  | 0.326   |                          |         |
|  | Urine <i>N. gonorrhoeae</i> (TMA)<br>positive* | ND**                 |         |                          |         |

224 \*\* Odds ratios could not be determined in logistic regression analysis because all clients who  
 225 were HIV-1 positive and/or positive for gonorrhoea by TMA were *E. histolytica* seronegative.

226 \*\*\* Multivariate analysis for age and sex, plus factors with  $p < 0.05$  in univariate analysis.

227 Abbreviations: OR, odds ratio; RPR, rapid plasma reagin; TPHA, *Treponema pallidum*

228 hemagglutination; TMA, transcription-mediated amplification; ND, not determined.

229

## 230 **DISCUSSION**

231 The most important finding of the present study was that the seroprevalence of *E.*  
232 *histolytica* was significantly (7.9 times) higher than that of HIV-1 and it was comparable to that  
233 for syphilis (by RPR), indicating that *E. histolytica* is now a potential re-emerging pathogen in  
234 our country. Certainly, it is difficult to simply compare seropositivity among these three tests; the  
235 HIV-1 screening test continues to be positive for a person's entire life whereas positivity in RPR  
236 and anti-*E. histolytica* antibody tests indicate current or recent infection [21, 22]. However, these  
237 results strongly indicate that the endemicity of *E. histolytica* in Tokyo is higher than that of HIV-  
238 1 and close to the level of syphilis. In contrast to our seroprevalence data, the national  
239 surveillance data of Japan from NESID pragmatically show that the annual number of diagnosed  
240 cases of amebiasis (1,151 in 2016) is not only much lower than that of syphilis (4,575 cases), it is  
241 also lower than that of HIV-1 (1,443 cases) [22, 23]. Our results suggest that the endemicity of  
242 amebiasis in Japan is currently underestimated, thereby remaining a neglected disease in Japan  
243 despite frequently reported life-threatening cases of amebiasis [24-27]. Interestingly, in the  
244 present study, all individuals who were seropositive for *E. histolytica* were HIV-1 negative  
245 whereas regression analysis identified that seropositivity for syphilis by TPHA was an  
246 independent risk factor of a positive result for anti-*E. histolytica* antibody. Previous reports have  
247 emphasized the high seroprevalence of *E. histolytica* [28] and increasing number of amebiasis  
248 cases [29-31] among individuals with HIV-1 infection. Although the epidemiological trend of *E.*

1  
2  
3 249 *histolytica* among HIV-1-positive individuals could not be assessed in this study owing to the  
4  
5 250 small number of clients who were positive for HIV-1, it should be noted that sexually transmitted  
6  
7 251 *E. histolytica* infection is currently spreading even among HIV-1-negative populations, as we  
8  
9 252 indicated in our previous hospital-based cross-sectional analysis [32]. Currently, screening for *E.*  
10  
11 253 *histolytica* is not routinely performed at VCT centres in Japan; however, public health  
12  
13 254 interventions should be considered to control sexually transmitted *E. histolytica* infection.

14  
15  
16  
17 255 The clinical significance of seropositivity for *E. histolytica* remains unclear and is beyond  
18  
19 256 the scope of this paper. Serologic testing is a sensitive diagnostic method for symptomatic  
20  
21 257 invasive amebiasis; however, positive results are also obtained for recent infections, up to the  
22  
23 258 previous several years [25]. However, we previously reported that 70.4% of *E. histolytica*-  
24  
25 259 seropositive individuals did not have any amebiasis-related symptoms nor any history of  
26  
27 260 treatment for amebiasis. Interestingly, 20% of such individuals in a Japanese HIV-1 cohort  
28  
29 261 developed symptomatic invasive amebiasis within a 1-year follow-up period [28]. In another  
30  
31 262 cross-sectional analysis, we also reported that ulcerative lesions owing to *E. histolytica* in the  
32  
33 263 large intestine are frequently identified (7/18, 38.9%) by colonoscopy among asymptomatic  
34  
35 264 individuals who are *E. histolytica* seropositive whereas these rarely (1/53, 1.9%) occur among *E.*  
36  
37 265 *histolytica*-seronegative people [33]. Serologic screening for *E. histolytica* at VCT centres,  
38  
39 266 followed by diagnosis of subclinical *E. histolytica* infection by colonoscopy and treatment at a  
40  
41 267 referral hospital, is one possible public health strategy against sexually transmitted *E. histolytica*  
42  
43 268 infection. However, we must assess the utility of serologic testing for the screening of  
44  
45 269 asymptomatic *E. histolytica* in well-designed prospective analyses in the future.

46  
47  
48  
49 270 The present study has some limitations that should be considered. First, this preliminary  
50  
51 271 investigation was a cross-sectional study of anonymous clients at a VCT centre. We could not

1  
2  
3 272 assess risk behaviours, including sexual orientation, socioeconomic status, sanitation, and dietary  
4  
5 273 habits, with respect to seropositivity for *E. histolytica* owing to a lack of detailed data on the  
6  
7 274 characteristics of clients. Therefore, further intensive epidemiological studies are needed, to  
8  
9  
10 275 assist in developing future intervention approaches for this re-emerging infectious disease. In  
11  
12 276 addition, the study periods were 2 months apart owing to the availability of data for not only  
13  
14 277 HIV-1 but also other STIs (serum tests for syphilis and urine tests for chlamydia and  
15  
16 278 gonorrhoea). We could not exclude the possibility of selection bias of clients, such as those who  
17  
18 279 undergo repeat testing. Second, anti-*E. histolytica* antibody was screened using stored serum.  
19  
20  
21 280 Long periods of storage could lead to lower sensitivity of serologic tests, resulting in  
22  
23 281 underestimation of the seroprevalence of *E. histolytica*. Third, we obtained a considerably lower  
24  
25 282 seropositive rate for *E. histolytica* among female clients (0.66%, 4/609) than that among males  
26  
27 283 (3.46%, 51/1,474). This probably results from the fact that VCT centres may not be appropriate  
28  
29 284 for identifying female populations at high risk for *E. histolytica* infection; our female clients  
30  
31 285 were relatively younger and had lower seropositive rates in RPR and TPHA tests. More  
32  
33 286 appropriate sampling locations should be identified, such as STI clinics that are visited by female  
34  
35 287 commercial sex workers [34].  
36  
37  
38  
39

40 288 In conclusion, among clients of a VCT centre in Tokyo, seropositivity for *E. histolytica*  
41  
42 289 was 7.9 times higher than that of HIV-1 and tended to be high among individuals at risk of  
43  
44 290 syphilis infection. Active detection and treatment of asymptomatic cases of *E. histolytica*  
45  
46 291 infection should be considered for the epidemiologic control of sexually transmitted *E.*  
47  
48 292 *histolytica* infection in Japan.  
49  
50

51 293

52 294

## 295 **Acknowledgements**

296 We thank Analisa Avila, ELS, of Edanz Group ([www.edanzediting.com/ac](http://www.edanzediting.com/ac)) for editing a  
297 draft of this manuscript.

## 299 **Contributors**

300 Conception or design on the work: YY, HG, YK, SO, MN, KY, TS, KS, KW. Data collection:  
301 MN, KY, TS, KS. Data analysis and interpretation: YY, MN, KY, TS, KS, KW. Drafting the  
302 article: YY, MN, KW. Critical revision of the article: YY, KW. Final approval of the version to  
303 be published: YY, HG, YK, SO, MN, KY, TS, KS, KW.

## 305 **Competing Interests**

306 None.

## 308 **Patient Consent**

309 Not acquired.

## 310 **Funding information**

311 This work was supported by the Emerging/Re-emerging Infectious Diseases Project of Japan  
312 from the Japan Agency for Medical Research and Development (AMED) under Grant Number  
313 18fk0108046, and a grant from the National Center for Global Health and Medicine (29-2013).

## 314 **Data sharing statement**

315 Extra data can be accessed via the Dryad data repository at <http://datadryad.org/> with the doi:  
316 doi:10.5061/dryad.kd51c5b2h

317

318 **References**

- 319 1. Haque R, Huston CD, Hughes M, et al. Amebiasis. *N Engl J Med*. 2003;348:1565-73.
- 320 2. Stanley SL, Jr. Amoebiasis. *Lancet*. 2003;361:1025-34.
- 321 3. Hung CC, Chang SY, Ji DD. *Entamoeba histolytica* infection in men who have sex with  
322 men. *Lancet Infect Dis*. 2012;12:729-36.
- 323 4. Wu H, Wu PY, Li SY, et al. Maximising the potential of voluntary counselling and  
324 testing for HIV: sexually transmitted infections and HIV epidemiology in a population  
325 testing for HIV and its implications for practice. *Sex Transm Infect*. 2012;88:612-6.
- 326 5. Ishikane M, Arima Y, Kanayama A, et al. Epidemiology of Domestically Acquired  
327 Amebiasis in Japan, 2000-2013. *Am J Trop Med Hyg*. 2016;94:1008-14.
- 328 6. Park WB, Choe PG, Jo JH, et al. Amebic liver abscess in HIV-infected patients, Republic  
329 of Korea. *Emerg Infect Dis*. 2007;13:516-7.
- 330 7. Stark D, van Hal SJ, Matthews G, et al. Invasive amebiasis in men who have sex with  
331 men, Australia. *Emerg Infect Dis*. 2008;14:1141-3.
- 332 8. Oh MD, Lee K, Kim E, et al. Amoebic liver abscess in HIV-infected patients. *AIDS*.  
333 2000;14:1872-3.
- 334 9. Spinzi G, Pugliese D, Filippi E. An Unexpected Cause of Chronic Diarrhea.  
335 *Gastroenterology*. 2016;150(1): e5-6.
- 336 10. Escola-Verge L, Arando M, Vall M, et al. Outbreak of intestinal amoebiasis among men  
337 who have sex with men, Barcelona (Spain), October 2016 and January 2017. *Euro*  
338 *Surveill* 2017; 22(30).
- 339 11. Roure S, Valerio L, Soldevila L, et al. Approach to amoebic colitis: Epidemiological,  
340 clinical and diagnostic considerations in a non-endemic context (Barcelona, 2007-2017).  
341 *PLoS One* 2019; 14(2): e0212791.
- 342 12. Timsit BL, Deroux A, Lugosi M, et al. Amoebiasis: May sexual transmission be an  
343 underestimated way of contamination?. *Rev Med Interne* 2018; 39(7): 586-8.
- 344 13. Hung CC, Wu PY, Chang SY, et al. Amebiasis among persons who sought voluntary  
345 counseling and testing for human immunodeficiency virus infection: a case-control study.  
346 *Am J Trop Med Hyg*. 2011;84:65-9.



- 1  
2  
3 347 14. Lo YC, Ji DD, Hung CC. Prevalent and incident HIV diagnoses among *Entamoeba*  
4 348 *histolytica*-infected adult males: a changing epidemiology associated with sexual  
5 349 transmission--Taiwan, 2006-2013. *PLoS Negl Trop Dis*. 2014;8:e3222.
- 8 350 15. Ministry of Health, Labor and Welfare [internet]. Tokyo: AIDS Surveillance Committee;  
9 351 c2017. [cited 2018 Aug 27]. Available from: [http://api-](http://api-net.jfap.or.jp/status/2017/17nenpo/17nenpo_menu.html)  
11 352 [net.jfap.or.jp/status/2017/17nenpo/17nenpo\\_menu.html](http://api-net.jfap.or.jp/status/2017/17nenpo/17nenpo_menu.html)
- 13 353 16. Ministry of Health, Labor and Welfare [internet]. Tokyo: AIDS Surveillance Committee;  
14 354 c2017. [cited 2018 Aug 27]. Available from: [http://api-](http://api-net.jfap.or.jp/status/2017/17nenpo/kensa.pdf)  
16 355 [net.jfap.or.jp/status/2017/17nenpo/kensa.pdf](http://api-net.jfap.or.jp/status/2017/17nenpo/kensa.pdf)
- 18 356 17. Ministry of Health, Labor and Welfare [internet]. Tokyo: AIDS Surveillance Committee;  
19 357 c2017. [cited 2018 Aug 27]. Available from: [http://api-](http://api-net.jfap.or.jp/status/2017/17nenpo/hyo_09_02.pdf)  
21 358 [net.jfap.or.jp/status/2017/17nenpo/hyo\\_09\\_02.pdf](http://api-net.jfap.or.jp/status/2017/17nenpo/hyo_09_02.pdf)
- 24 359 18. Morre SA, van den Brule AJ, Rozendaal L, et al. The natural course of asymptomatic  
25 360 *Chlamydia trachomatis* infections: 45% clearance and no development of clinical PID  
26 361 after one-year follow-up. *Int J STD AIDS*. 2002;13(Suppl 2):12-8.
- 29 362 19. Wiesenfeld HC. Screening for *Chlamydia trachomatis* Infections in Women. *N Engl J*  
30 363 *Med*. 2017;376:765-73.
- 32 364 20. Cecil JA, Howell MR, Tawes JJ, et al. Features of *Chlamydia trachomatis* and *Neisseria*  
33 365 *gonorrhoeae* infection in male Army recruits. *J Infect Dis*. 2001;184:1216-9.
- 36 366 21. Detels R, Green AM, Klausner JD, et al. The incidence and correlates of symptomatic  
37 367 and asymptomatic *Chlamydia trachomatis* and *Neisseria gonorrhoeae* infections in  
38 368 selected populations in five countries. *Sex Transm Dis*. 2011;38:503-9.
- 41 369 22. Ministry of Health Law. Annual reported cases of sexually transmitted infections in  
42 370 Japan [in Japanese]. [cited 2018 Sep]. Available from:  
44 371 <https://www.mhlw.go.jp/topics/2005/04/tp0411-1.html>
- 46 372 23. National Institute of Infectious Diseases. Infectious Agents Surveillance Report. Annual  
47 373 reported cases of Category V Infectious Diseases in Japan [in Japanese]. [cited 2018  
48 374 Sep ]. Available from: <https://www.mhlw.go.jp/topics/2005/04/tp0411-1.html>
- 51 375 24. Goto M, Mizushima Y, Matsuoka T. Fulminant amoebic enteritis that developed in the  
52 376 perinatal period. *BMJ Case Rep*. 2015 Jan;2015.

- 1  
2  
3 377 25. Ito D, Hata S, Seiichiro S, et al. Amebiasis presenting as acute appendicitis: Report of a  
4 378 case and review of Japanese literature. *Int J Surg Case Rep.* 2014;5:1054-7.  
5  
6 379 26. Kobayashi T, Watanabe K, Yano H, et al. Underestimated Amoebic Appendicitis among  
7 380 HIV-1-Infected Individuals in Japan. *J Clin Microbiol.* 2017;55:313-20.  
8  
9 381 27. Yamada H, Matsuda K, Akahane T, et al. A case of fulminant amoebic colitis with  
10 382 multiple large intestinal perforations. *Int Surg.* 2010;95:356-9.  
11  
12 383 28. Watanabe K, Aoki T, Nagata N, et al. Clinical significance of high anti-*Entamoeba*  
13 384 *histolytica* antibody titer in asymptomatic HIV-1-infected individuals. *J Infect Dis.*  
14 385 2014;209:1801-7.  
15  
16 386 29. Yoshikura H. A Strong Correlation between the Annual Incidence of Amebiasis and  
17 387 Homosexual Human Immunodeficiency Virus Type Infection in Men. *Jpn J Infect Dis.*  
18 388 2016;69:266-9.  
19  
20 389 30. Ohnishi K, Kato Y, Imamura A, et al. Present characteristics of symptomatic *Entamoeba*  
21 390 *histolytica* infection in the big cities of Japan. *Epidemiol Infect.* 2004;132:57-60.  
22  
23 391 31. Watanabe K, Gatanaga H, Escueta-de Cadiz A, et al. Amebiasis in HIV-1-infected  
24 392 Japanese men: clinical features and response to therapy. *PLoS Negl Trop Dis.*  
25 393 2011;5:e1318.  
26  
27 394 32. Yanagawa Y, Nagata N, Watanabe K, et al. Increases in *Entamoeba histolytica* Antibody-  
28 395 Positive Rates in Human Immunodeficiency Virus-Infected and Noninfected Patients in  
29 396 Japan: A 10-Year Hospital-Based Study of 3,514 Patients. *Am J Trop Med Hyg.*  
30 397 2016;95:604-9.  
31  
32 398 33. Watanabe K, Nagata N, Sekine K, et al. Asymptomatic Intestinal Amebiasis in Japanese  
33 399 HIV-1-Infected Individuals. *Am J Trop Med Hyg.* 2014;91:816-20.  
34  
35 400 34. Suzuki J, Kobayashi S, Iku I, et al. Seroprevalence of *Entamoeba histolytica* infection in  
36 401 female outpatients at a sexually transmitted disease sentinel clinic in Tokyo, Japan. *Jpn J*  
37 402 *Infect Dis.* 2008;61:175-8.  
38  
39 403

1  
2  
3 4044 405 **Figure legends**

6  
7 406 **Figure 1. Proportion of clients in each age group among men and women.** The average age  
8  
9 407 among female clients was significantly lower than that in male clients ( $p < 0.001$ ). The  
10  
11 408 proportion of clients aged 29 years or less among female clients was 53.4% whereas that in male  
12  
13 409 clients was only 29.6%.

14  
15  
16 410 **Figure 2. Seropositivity for *Entamoeba histolytica* and other sexually transmitted infections**  
17  
18 411 **(STIs) in Tokyo.** Serologic testing results (anti-*E. histolytica* antibody, HIV-1, RPR, and TPHA)  
19  
20 412 were obtained for 2,083 clients of a voluntary counselling and testing centre in June and  
21  
22 413 December of 2017. Results of urinary TMA for *Chlamydia trachomatis* and *Neisseria*  
23  
24 414 *gonorrhoeae* were available for 1,437 clients who agreed to testing. All statistics were calculated  
25  
26 415 using Fisher's exact test. (A) The seropositive rate for *E. histolytica* was compared with those of  
27  
28 416 other STIs. (B) Comparison of seropositivity for *E. histolytica*, with and without other STIs.  
29  
30 417 Abbreviations: CI, confidence interval; RPR, rapid plasma reagin; TPHA, *Treponema pallidum*  
31  
32 418 hemagglutination; TMA, transcription-mediated amplification.

33  
34  
35 419 **Figure 3. Positive rate of sexually transmitted infections (STIs) by sex and age group.** (A)  
36  
37 420 Positive rate of *Entamoeba histolytica* and other STIs were compared between male ( $n = 1474$ )  
38  
39 421 and female ( $n = 609$ ) clients using Fisher's exact test. (B) Seropositive rates for *E. histolytica* and  
40  
41 422 RPR, and TMA positivity for *Chlamydia trachomatis* were calculated for clients of different age  
42  
43 423 groups (serum, urine samples): 29 years or younger (752, 503), 30–39 years (666, 453), 40–49  
44  
45 424 years (443, 315), and 50s or older (222, 167). Correlation between age and positivity was  
46  
47 425 calculated using the chi-square test for trend. Abbreviations: RPR, rapid plasma reagin test;  
48  
49 426 TPHA, *Treponema pallidum* hemagglutination; TMA, transcription-mediated amplification.

50  
51  
52  
53  
54  
55 21  
56  
57  
58  
59  
60

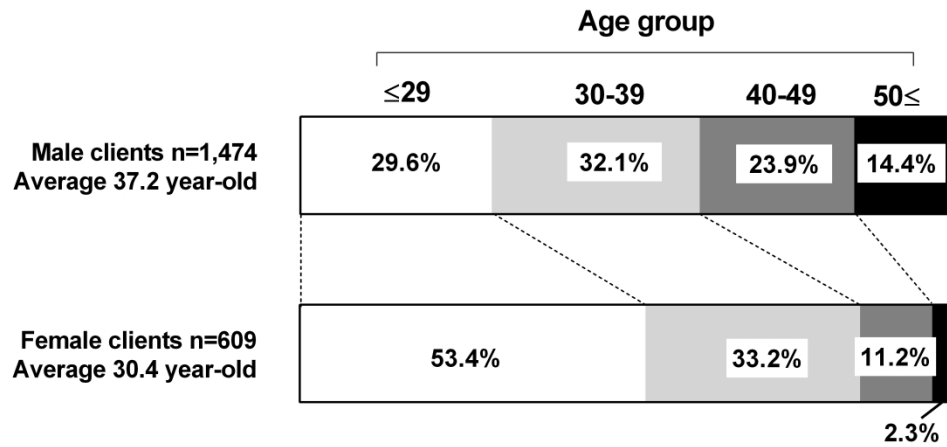

Figure 1. Proportion of clients in each age group among men and women. The average age among female clients was significantly lower than that in male clients ( $p < 0.001$ ). The proportion of clients aged 29 years or less among female clients was 53.4% whereas that in male clients was only 29.6%.

196x175mm (600 x 600 DPI)

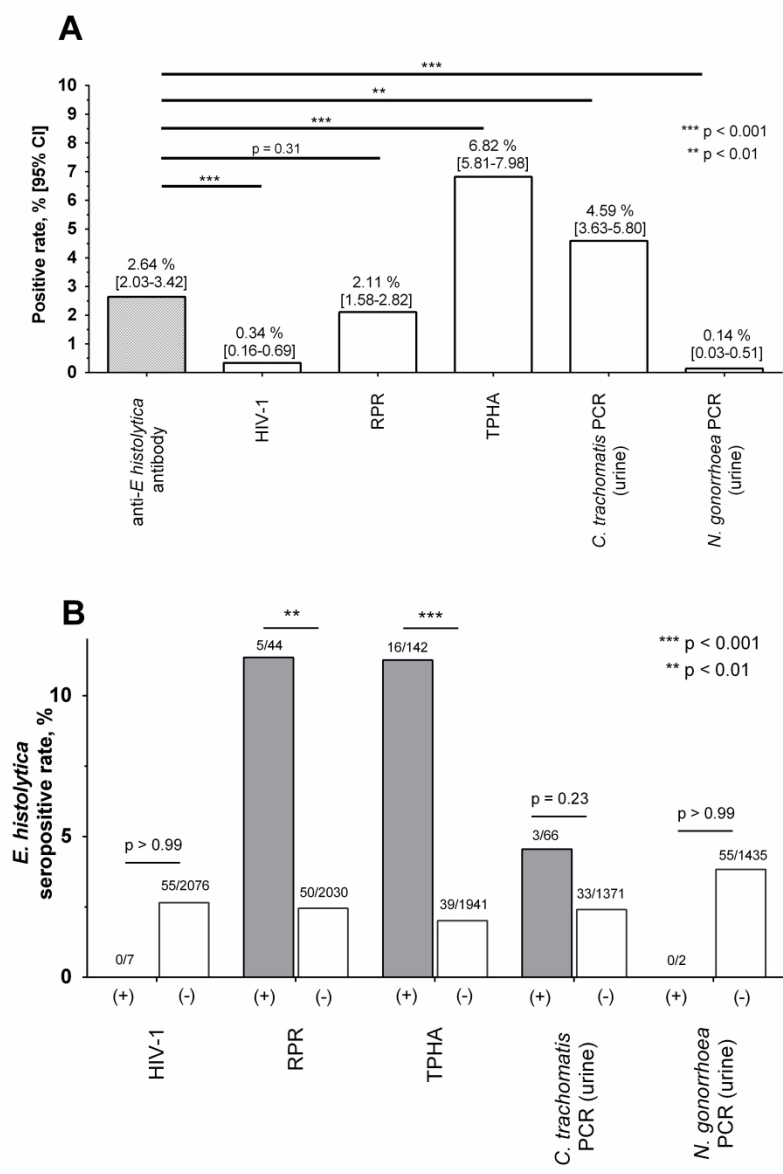

Figure 2. Seropositivity for *Entamoeba histolytica* and other sexually transmitted infections (STIs) in Tokyo. Serologic testing results (anti-*E. histolytica* antibody, HIV-1, RPR, and TPHA) were obtained for 2,083 clients of a voluntary counselling and testing centre in June and December of 2017. Results of urinary TMA for *Chlamydia trachomatis* and *Neisseria gonorrhoeae* were available for 1,437 clients who agreed to testing. All statistics were calculated using Fisher's exact test. (A) The seropositive rate for *E. histolytica* was compared with those of other STIs. (B) Comparison of seropositivity for *E. histolytica*, with and without other STIs. Abbreviations: CI, confidence interval; RPR, rapid plasma reagin; TPHA, *Treponema pallidum* hemagglutination; TMA, transcription-mediated amplification.

190x273mm (600 x 600 DPI)

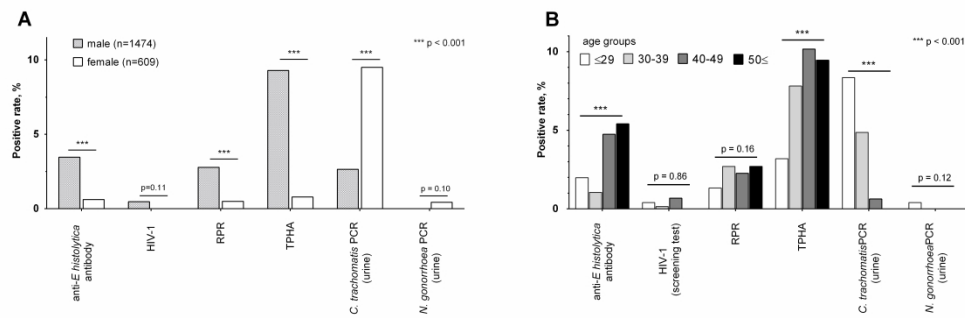

Figure 3. Positive rate of sexually transmitted infections (STIs) by sex and age group. (A) Positive rate of *Entamoeba histolytica* and other STIs were compared between male (n = 1474) and female (n = 609) clients using Fisher's exact test. (B) Seropositive rates for *E. histolytica* and RPR, and TMA positivity for *Chlamydia trachomatis* were calculated for clients of different age groups (serum, urine samples): 29 years or younger (752, 503), 30–39 years (666, 453), 40–49 years (443, 315), and 50s or older (222, 167). Correlation between age and positivity was calculated using the chi-square test for trend. Abbreviations: RPR, rapid plasma reagin test; TPHA, *treponema pallidum* hemagglutination; TMA, transcription-mediated amplification.

278x94mm (600 x 600 DPI)

STROBE Statement—Checklist of items that should be included in reports of *cross-sectional studies*

|                              | Item No | Recommendation                                                                                                                                                                                                                                                                                                                                                                                                                                                                                                                                       |
|------------------------------|---------|------------------------------------------------------------------------------------------------------------------------------------------------------------------------------------------------------------------------------------------------------------------------------------------------------------------------------------------------------------------------------------------------------------------------------------------------------------------------------------------------------------------------------------------------------|
| <b>Title and abstract</b>    | 1       | (a) Indicate the study's design with a commonly used term in the title or the abstract<br><b>[Indicated in the method section of the abstract on page 3]</b><br>(b) Provide in the abstract an informative and balanced summary of what was done and what was found <b>[Provided in method and results section of abstract on page 3]</b>                                                                                                                                                                                                            |
| <b>Introduction</b>          |         |                                                                                                                                                                                                                                                                                                                                                                                                                                                                                                                                                      |
| Background/rationale         | 2       | Explain the scientific background and rationale for the investigation being reported<br><b>[Explained in the introduction section of manuscript on page 4]</b>                                                                                                                                                                                                                                                                                                                                                                                       |
| Objectives                   | 3       | State specific objectives, including any prespecified hypotheses <b>[Stated at the end of the introduction part of manuscript on page 5]</b>                                                                                                                                                                                                                                                                                                                                                                                                         |
| <b>Methods</b>               |         |                                                                                                                                                                                                                                                                                                                                                                                                                                                                                                                                                      |
| Study design                 | 4       | Present key elements of study design early in the paper <b>[Presented under methods section of the manuscript on page 5]</b>                                                                                                                                                                                                                                                                                                                                                                                                                         |
| Setting                      | 5       | Describe the setting, locations, and relevant dates, including periods of recruitment, exposure, follow-up, and data collection <b>[Described under methods section of the manuscript on page 5]</b>                                                                                                                                                                                                                                                                                                                                                 |
| Participants                 | 6       | (a) Give the eligibility criteria, and the sources and methods of selection of participants <b>[Given under methods section on page 5-6]</b>                                                                                                                                                                                                                                                                                                                                                                                                         |
| Variables                    | 7       | Clearly define all outcomes, exposures, predictors, potential confounders, and effect modifiers. Give diagnostic criteria, if applicable <b>[Defined under methods section on pages 6, diagnostic details provided in serological testing under methods page 5-6]</b>                                                                                                                                                                                                                                                                                |
| Data sources/<br>measurement | 8*      | For each variable of interest, give sources of data and details of methods of assessment (measurement). Describe comparability of assessment methods if there is more than one group <b>[Described under participants and statistical analysis section of methods, pages 5-6]</b>                                                                                                                                                                                                                                                                    |
| Bias                         | 9       | Describe any efforts to address potential sources of bias <b>[Described under study population, samples, and ethics issues section of methods, page 5-6]</b>                                                                                                                                                                                                                                                                                                                                                                                         |
| Study size                   | 10      | Explain how the study size was arrived at <b>[Explained in sample size under methods, page 5]</b>                                                                                                                                                                                                                                                                                                                                                                                                                                                    |
| Quantitative variables       | 11      | Explain how quantitative variables were handled in the analyses. If applicable, describe which groupings were chosen and why <b>[Explained in methods, statistics page 6-7]</b>                                                                                                                                                                                                                                                                                                                                                                      |
| Statistical methods          | 12      | (a) Describe all statistical methods, including those used to control for confounding <b>[Described in statistics page 7]</b><br>(b) Describe any methods used to examine subgroups and interactions <b>[Described in statistics page 5-7]</b><br>(c) Explain how missing data were addressed <b>[Described in study population, samples, and ethics issues section of methods, page 6]</b><br>(d) If applicable, describe analytical methods taking account of sampling strategy <b>[N/A]</b><br>(e) Describe any sensitivity analyses <b>[N/A]</b> |
| <b>Results</b>               |         |                                                                                                                                                                                                                                                                                                                                                                                                                                                                                                                                                      |
| Participants                 | 13*     | (a) Report numbers of individuals at each stage of study—eg numbers potentially eligible, examined for eligibility, confirmed eligible, included in the study, completing follow-up, and analysed <b>[Reported in results section page 7]</b><br>(b) Give reasons for non-participation at each stage <b>[N/A]</b><br>(c) Consider use of a flow diagram <b>[N/A]</b>                                                                                                                                                                                |

|    |                          |     |                                                                                                                                                                                                                                                                                            |
|----|--------------------------|-----|--------------------------------------------------------------------------------------------------------------------------------------------------------------------------------------------------------------------------------------------------------------------------------------------|
| 1  |                          |     |                                                                                                                                                                                                                                                                                            |
| 2  | Descriptive data         | 14* | (a) Give characteristics of study participants (eg demographic, clinical, social) and information on exposures and potential confounders [ <b>Given in results section page 7-9</b> ]                                                                                                      |
| 3  |                          |     | (b) Indicate number of participants with missing data for each variable of interest [ <b>N/A</b> ]                                                                                                                                                                                         |
| 4  |                          |     |                                                                                                                                                                                                                                                                                            |
| 5  |                          |     |                                                                                                                                                                                                                                                                                            |
| 6  | Outcome data             | 15* | Report numbers of outcome events or summary measures [ <b>Reported in results section pages 7-11</b> ]                                                                                                                                                                                     |
| 7  |                          |     |                                                                                                                                                                                                                                                                                            |
| 8  | Main results             | 16  | (a) Give unadjusted estimates and, if applicable, confounder-adjusted estimates and their precision (eg, 95% confidence interval). Make clear which confounders were adjusted for and why they were included [ <b>Described under method (page 5-6) and results and tables pages 7-9</b> ] |
| 9  |                          |     | (b) Report category boundaries when continuous variables were categorized [ <b>Reported under results, figures, and tables page 8-10</b> ]                                                                                                                                                 |
| 10 |                          |     | (c) If relevant, consider translating estimates of relative risk into absolute risk for a meaningful time period [ <b>N/A</b> ]                                                                                                                                                            |
| 11 |                          |     |                                                                                                                                                                                                                                                                                            |
| 12 |                          |     |                                                                                                                                                                                                                                                                                            |
| 13 |                          |     |                                                                                                                                                                                                                                                                                            |
| 14 |                          |     |                                                                                                                                                                                                                                                                                            |
| 15 |                          |     |                                                                                                                                                                                                                                                                                            |
| 16 |                          |     |                                                                                                                                                                                                                                                                                            |
| 17 |                          |     |                                                                                                                                                                                                                                                                                            |
| 18 | Other analyses           | 17  | Report other analyses done—eg analyses of subgroups and interactions, and sensitivity analyses [ <b>N/A</b> ]                                                                                                                                                                              |
| 19 |                          |     |                                                                                                                                                                                                                                                                                            |
| 20 |                          |     |                                                                                                                                                                                                                                                                                            |
| 21 | <b>Discussion</b>        |     |                                                                                                                                                                                                                                                                                            |
| 22 | Key results              | 18  | Summarise key results with reference to study objectives [ <b>Page 11</b> ]                                                                                                                                                                                                                |
| 23 | Limitations              | 19  | Discuss limitations of the study, taking into account sources of potential bias or imprecision. Discuss both direction and magnitude of any potential bias [ <b>Discussed on page 12-13</b> ]                                                                                              |
| 24 |                          |     |                                                                                                                                                                                                                                                                                            |
| 25 |                          |     |                                                                                                                                                                                                                                                                                            |
| 26 |                          |     |                                                                                                                                                                                                                                                                                            |
| 27 |                          |     |                                                                                                                                                                                                                                                                                            |
| 28 | Interpretation           | 20  | Give a cautious overall interpretation of results considering objectives, limitations, multiplicity of analyses, results from similar studies, and other relevant evidence [ <b>Given on page 12-13</b> ]                                                                                  |
| 29 |                          |     |                                                                                                                                                                                                                                                                                            |
| 30 |                          |     |                                                                                                                                                                                                                                                                                            |
| 31 |                          |     |                                                                                                                                                                                                                                                                                            |
| 32 | Generalisability         | 21  | Discuss the generalisability (external validity) of the study results [ <b>Discussed on page 12-13</b> ]                                                                                                                                                                                   |
| 33 |                          |     |                                                                                                                                                                                                                                                                                            |
| 34 | <b>Other information</b> |     |                                                                                                                                                                                                                                                                                            |
| 35 | Funding                  | 22  | Give the source of funding and the role of the funders for the present study and, if applicable, for the original study on which the present article is based [ <b>Given in acknowledgement section page 15</b> ]                                                                          |
| 36 |                          |     |                                                                                                                                                                                                                                                                                            |
| 37 |                          |     |                                                                                                                                                                                                                                                                                            |
| 38 |                          |     |                                                                                                                                                                                                                                                                                            |
| 39 |                          |     |                                                                                                                                                                                                                                                                                            |

\*Give information separately for exposed and unexposed groups.

**Note:** An Explanation and Elaboration article discusses each checklist item and gives methodological background and published examples of transparent reporting. The STROBE checklist is best used in conjunction with this article (freely available on the Web sites of PLoS Medicine at <http://www.plosmedicine.org/>, Annals of Internal Medicine at <http://www.annals.org/>, and Epidemiology at <http://www.epidem.com/>). Information on the STROBE Initiative is available at [www.strobe-statement.org](http://www.strobe-statement.org).
